# Supplementary material for: Exome sequencing identifies frequent mutation of ARID1A in molecular subtypes of gastric cancer
Source: Springer Nature journal article supplement (doi:10.1038/ng.982), 2011-10-30
Supplement: 41588_2011_BFng982_MOESM26_ESM.pdf [file 41588_2011_BFng982_MOESM26_ESM.pdf]

# Supplemental Information

---

## *Exome sequencing identifies frequent mutation of ARID1A in molecular subtypes of gastric cancer*

Kai Wang<sup>1,7</sup>, Junsuo Kan<sup>2,7</sup>, Siu Tsan Yuen<sup>2</sup>, Stephanie T Shi<sup>3</sup>, Kent Man Chu<sup>4</sup>, Simon Law<sup>4</sup>, Tsun Leung Chan<sup>2</sup>, Zhengyan Kan<sup>1</sup>, Annie SY Chan<sup>2</sup>, Wai Yin Tsui<sup>2</sup>, Siu Po Lee<sup>2</sup>, Siu Lun Ho<sup>2</sup>, Anthony KW Chan<sup>2</sup>, Grace HW Cheng<sup>2</sup>, Peter C Roberts<sup>5</sup>, Paul A Rejto<sup>1</sup>, Neil W Gibson<sup>1,6</sup>, David J Pocalyko<sup>1</sup>, Mao Mao<sup>1</sup>, Jiangchun Xu<sup>1</sup>, Suet Yi Leung<sup>2</sup>

<sup>1</sup>Oncology Research Unit, <sup>3</sup>External Research Solutions, <sup>5</sup>Research Embedded Business Technology, Pfizer Worldwide Research and Development, La Jolla, California, USA.

Department of <sup>2</sup>Pathology and <sup>4</sup>Surgery, The University of Hong Kong, Queen Mary Hospital, Pokfulam, Hong Kong.

<sup>6</sup>Present address: Regulus Therapeutics, San Diego, California, USA

<sup>7</sup>These authors contributed equally to this work.

Correspondence should be addressed to J.X. ([jiangchun.xu@pfizer.com](mailto:jiangchun.xu@pfizer.com)) or S.Y.L. ([suetyi@hku.hk](mailto:suetyi@hku.hk))

### Index of all supplementary figures, tables and notes

#### Supplementary Figures

**Supplementary Figure 1.** Representative DNA sequencing chromatogram of gastric cancers with ARID1A mutation.

**Supplementary Figure 2.** Representative immunostaining results for ARID1A in gastric cancers.

**Supplementary Figure 3.** Kaplan-Meier plot of ARID1A alterations (mutation and/or reduced protein level) in relation to recurrence-free survival in 62 gastric cancer patients who underwent curative resection.

**Supplementary figure 4.** Somatic indel mutation rate of mononucleotide repeat tracts in ARID1A relative to background mutation rate in MSI gastric cancers.

#### Supplementary Tables

**Supplementary tables 4, 6, 7, 9, 10 and 13 are attached individually in Excel**

Supplementary Table 1 Clinico-pathological data of 109 gastric cancer patients in the discovery and validation cohort

Supplementary Table 2. Summary of whole-exome sequencing statistics for the discovery cohort.

Supplementary Table 3. Sequenom validation results for whole exome sequencing predicted somatic SNVs and somatic indels

Supplementary Table 4. List of all somatic mutations identified in the SureSelect All Exon kit baited regions in 22 gastric cancers

Supplementary Table 5. Comparison of somatic point mutation spectra across different subtypes of gastric cancers

Supplementary Table 6. Comparison of list of gastric cancer genes with protein altering mutations detected in exome study versus kinome study

Supplementary Table 7. List of genes with protein-altering somatic mutations in at least two patients in the gastric cancer cohort and their driver gene scores

Supplementary Table 8. Core signaling pathways and processes frequently altered in gastric cancers.

Supplementary Table 9. Pathways enriched in somatically mutated genes in gastric cancer

Supplementary Table 10. List of all protein-altering somatic mutations involving chromatin modification genes in 22 gastric cancers

Supplementary Table 11. Clinico-pathological summary of 109 gastric cancer patients sequenced for ARID1A

Supplementary Table 12. Summary of relationship of ARID1A mutation with protein expression and molecular subtypes of gastric cancer

Supplementary Table 13. Complete list of ARID1A and TP53 somatic mutations in 109 gastric cancers and their associated molecular parameters

Supplementary Table 14. Univariate and multivariate cox regression analysis of variables related to recurrence-free survival in 62 gastric cancer patients undergoing curative resection and analyzed for ARID1A mutation

Supplementary Table 15. Comparison of mutation rate of mononucleotide repeats in ARID1A gene versus background mutation rate in MSI gastric cancers

Supplementary Table 16. Primers used for ARID1A and TP53 Sanger sequencing

Supplementary Table 17. Background mutation rate estimates for somatic SNVs and somatic indels in the studied gastric cancer cohort

### **Supplementary Note**

Algorithms for exome-sequencing data analysis, somatic mutation callers, mutation annotation and functional impact prediction, driver gene prediction and pathway analysis

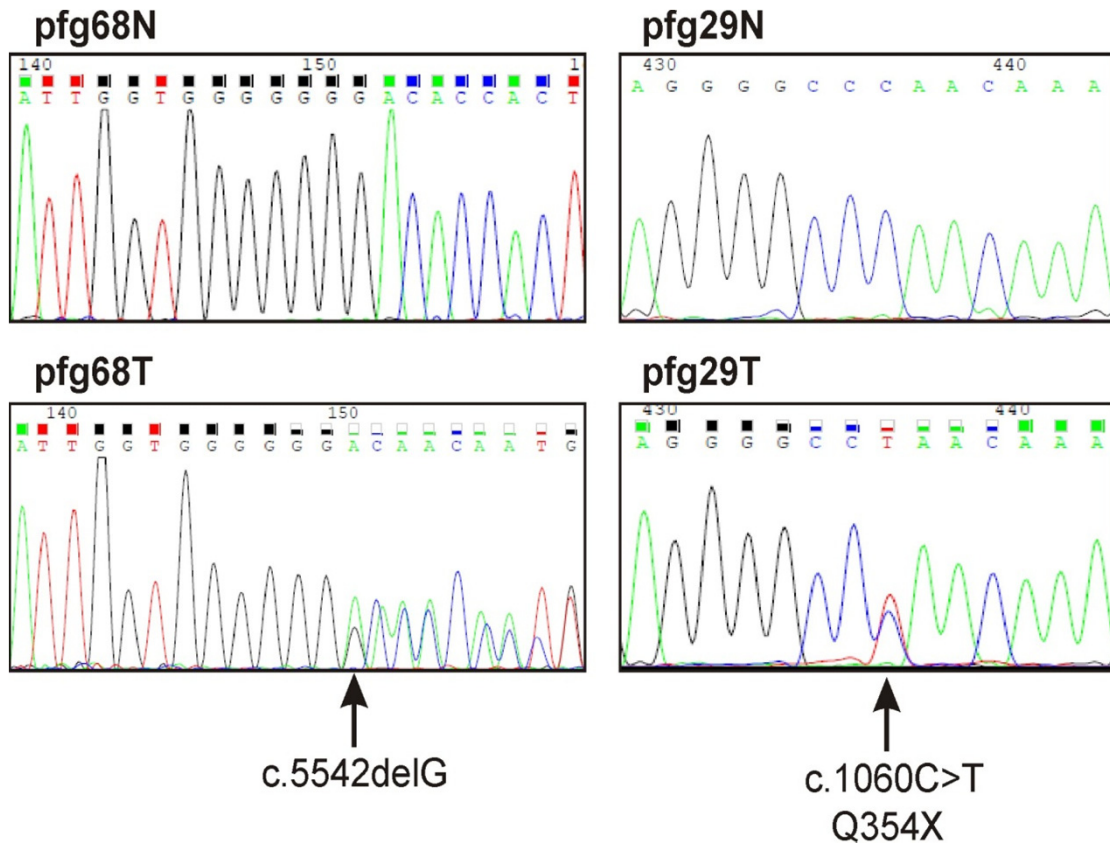

Supplementary Figure 1 Representative DNA sequencing chromatogram of gastric cancers with ARID1A mutation

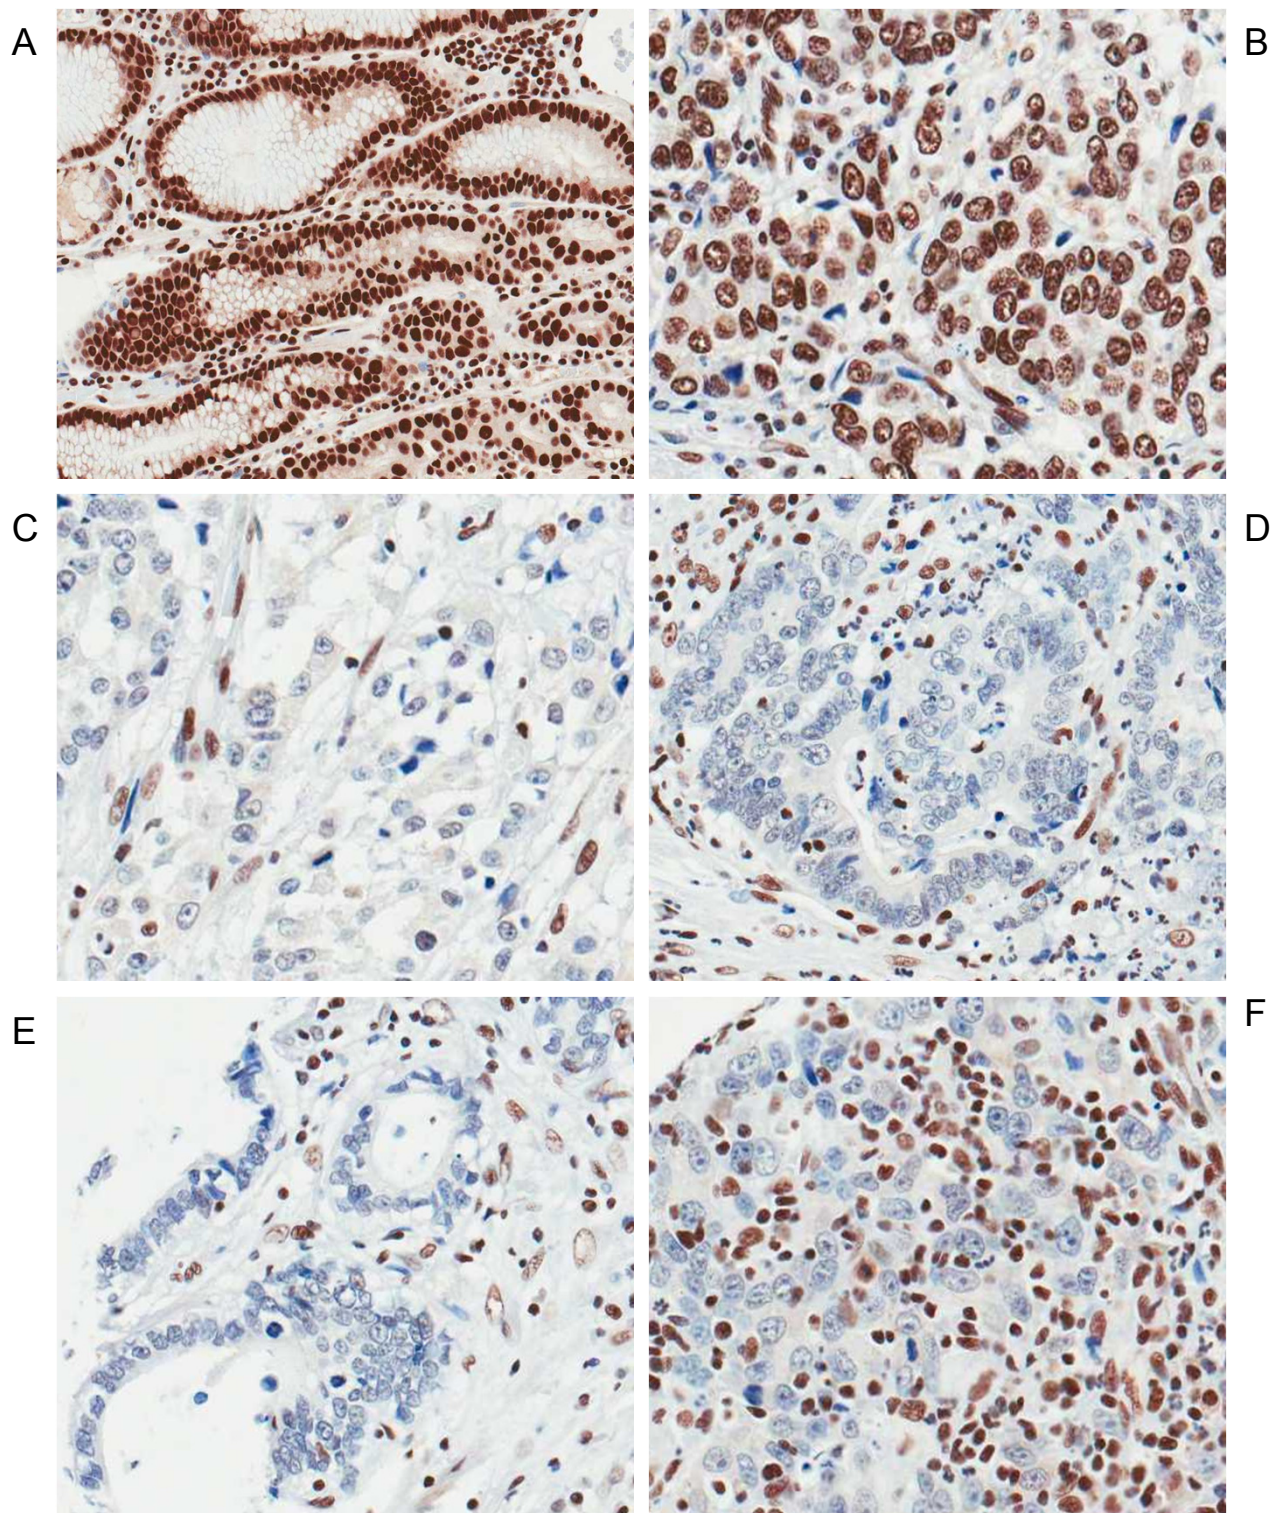

Supplementary Figure 2 Representative immunostaining results for ARID1A in gastric cancers. (A) Normal gastric mucosa shows uniform nuclear staining of epithelial and stromal cells. (B) A gastric cancer with normal nuclear expression of ARID1A (case pfg014). (C-F) Gastric cancers with loss of nuclear expression of ARID1A. Note the strong positive staining of stromal fibroblasts and lymphocytes. (C) Case pfg018, EBV GC with 1 ARID1A mutation. (D) Case SX186, MSI GC with 2 ARID1A mutation. (E) Case pfg029, MSS non-EBV GC with 1 ARID1A mutation. (F) Case SX165, EBV GC with protein loss despite absence of ARID1A mutation.

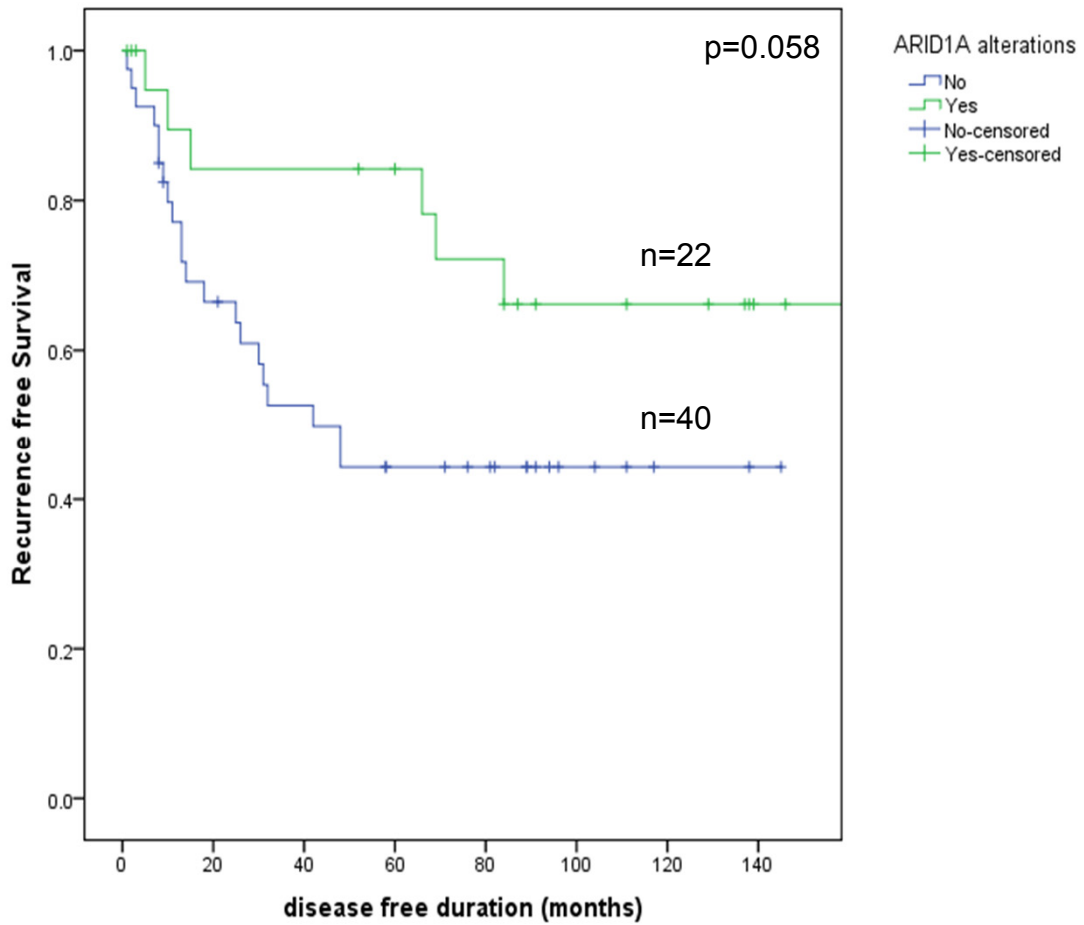

Supplementary Figure 3 Kaplan-meier plot of ARID1A alterations (mutation and/or reduced protein level) in relation to recurrence-free survival in 62 gastric cancer patients who underwent curative resection

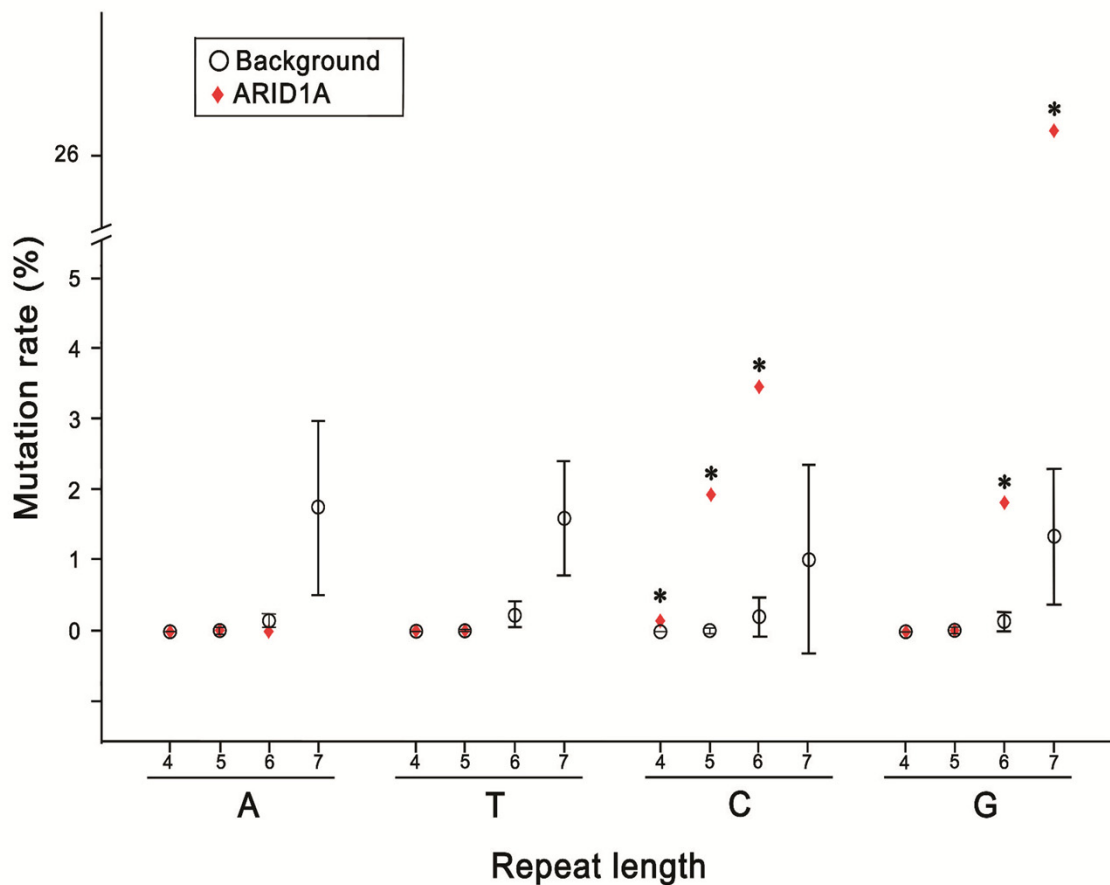

Supplementary Figure 4 Somatic indel mutation rate of mononucleotide repeat tracts in ARID1A relative to background mutation rate in MSI gastric cancers. The X-axis denotes the mononucleotide repeat length of the 4 nucleotides A, T, C and G. Black circles denote mean background somatic indel mutation rate of specific repeats in 4 MSI GCs derived from the interrogation of all coding exons of 16,586 genes in SureSelect capture baits with adequate sequence coverage. The error bar indicates  $\pm 2$  standard deviations. Red diamonds indicates somatic indel mutation rate of the specific repeat in ARID1A coding exons in 23 MSI GCs. Some repeats are not present in ARID1A gene. Asterisks denote statistically significant difference at  $p \leq 0.000025$  (see Supplementary Table 15 for detailed statistics).

Supplementary Table 1 Clinico-pathological data of 109 gastric cancer patients in the discovery and validation cohort

| Sample code | Study cohort     | Tumor content (%) | SEX | AGE | EBV status <sup>a</sup> | Microsatellite instability status <sup>b</sup> | Helicobacter pylori infection <sup>c</sup> | Tumor site | Tumor differentiation | Lauren's type              | UICC tumor stage <sup>d</sup> | T stage | N stage | M stage | Operation type | Recurrence status | Disease free survival (month) | Survival status   | Cancer specific survival (month) |
|-------------|------------------|-------------------|-----|-----|-------------------------|------------------------------------------------|--------------------------------------------|------------|-----------------------|----------------------------|-------------------------------|---------|---------|---------|----------------|-------------------|-------------------------------|-------------------|----------------------------------|
| pfg001T     | Exome sequencing | 70                | F   | 73  | negative                | MSS                                            | positive                                   | cardia     | poor                  | mixed                      | IV                            | T4      | 2       | 0       | palliative     |                   | 4                             | Died of disease   | 4                                |
| pfg002T     | Exome sequencing | 90                | M   | 39  | negative                | MSS                                            | negative                                   | antrum     | poor                  | intestinal                 | IV                            | T4      | 0       | 1       | palliative     |                   | 3                             | Died of disease   | 3                                |
| pfg003T     | Exome sequencing | 70                | F   | 65  | negative                | MSS                                            | positive                                   | body       | poor                  | mixed                      | IIIA                          | T3      | 1       | 0       | curative       | No recurrence     | 146                           | Alive or censored | 146                              |
| pfg005T     | Exome sequencing | 75                | F   | 71  | negative                | MSS                                            | positive                                   | antrum     | poor                  | diffuse (signet ring cell) | IV                            | T2a     | 3       | 0       | curative       | Recur             | 26                            | Died of disease   | 38                               |
| pfg006T     | Exome sequencing | 95                | M   | 83  | negative                | MSS                                            | negative                                   | antrum     | moderate              | intestinal                 | II                            | T3      | 0       | 0       | curative       | No recurrence     | 76                            | Alive or censored | 76                               |
| pfg007T     | Exome sequencing | 95                | M   | 87  | negative                | MSS                                            | positive                                   | cardia     | moderate              | intestinal                 | IV                            | T4      | 1       | 1       | palliative     |                   | 3                             | Died of disease   | 3                                |
| pfg008T     | Exome sequencing | 80                | F   | 68  | negative                | MSI                                            | positive                                   | antrum     | moderate              | intestinal                 | II                            | T2b     | 1       | 0       | curative       | Recur             | 84                            | Died of disease   | 87                               |
| pfg009T     | Exome sequencing | 90                | M   | 67  | positive                | MSS                                            | positive                                   | body       | poor                  | intestinal                 | II                            | T2b     | 1       | 0       | curative       | Recur             | 31                            | Died of disease   | 31                               |
| pfg010T     | Exome sequencing | 95                | M   | 79  | negative                | MSS                                            | positive                                   | antrum     | well                  | intestinal                 | IB                            | T2b     | 0       | 0       | curative       | Recur             | 48                            | Died of disease   | 72                               |
| pfg011T     | Exome sequencing | 90                | M   | 60  | negative                | MSS                                            | negative                                   | cardia     | poor                  | intestinal                 | II                            | T2b     | 1       | 0       | curative       | No recurrence     | 96                            | Alive or censored | 96                               |
| pfg014T     | Exome sequencing | 85                | M   | 74  | negative                | MSS                                            | positive                                   | cardia     | poor                  | intestinal                 | IV                            | T3      | 3       | 0       | palliative     |                   | 3                             | Died of disease   | 5                                |
| pfg015T     | Exome sequencing | 80                | F   | 77  | negative                | MSS                                            | negative                                   | antrum     | poor                  | diffuse (signet ring cell) | IV                            | T3      | 1       | 1       | palliative     |                   | 2                             | Died of disease   | 2                                |
| pfg016T     | Exome sequencing | 90                | M   | 55  | negative                | MSI                                            | negative                                   | antrum     | moderate              | intestinal                 | IV                            | T4      | 1       | 0       | curative       | No recurrence     | 178                           | Alive or censored | 178                              |
| pfg017T     | Exome sequencing | 80                | M   | 63  | negative                | MSI                                            | negative                                   | antrum     | moderate              | intestinal                 | II                            | T2b     | 1       | 0       | curative       | No recurrence     | 184                           | Alive or censored | 184                              |
| pfg018T     | Exome sequencing | 80                | M   | 37  | positive                | MSS                                            | positive                                   | body       | moderate              | intestinal                 | IIIB                          | T3      | 2       | 0       | palliative     |                   | 1                             | Alive or censored | 1                                |
| pfg019T     | Exome sequencing | 90                | M   | 57  | negative                | MSI                                            | positive                                   | body       | moderate              | intestinal                 | IB                            | T2b     | 0       | 0       | curative       | Recur             | 69                            | Died of disease   | 72                               |
| pfg020T     | Exome sequencing | 90                | M   | 60  | negative                | MSS                                            | negative                                   | cardia     | poor                  | intestinal                 | IV                            | T4      | 3       | 0       | palliative     |                   | 21                            | Died of disease   | 28                               |
| pfg021T     | Exome sequencing | 80                | M   | 83  | negative                | MSS                                            | positive                                   | body       | moderate              | intestinal                 | IIIA                          | T3      | 1       | 0       | curative       | Recur             | 25                            | Died of disease   | 29                               |
| pfg022T     | Exome sequencing | 90                | M   | 61  | positive                | MSS                                            | negative                                   | body       | poor                  | intestinal                 | IIIB                          | T3      | 2       | 0       | palliative     |                   | 11                            | Died of disease   | 11                               |
| pfg024T     | Exome sequencing | 85                | F   | 77  | negative                | MSS                                            | negative                                   | cardia     | moderate              | intestinal                 | IV                            | T2a     | 1       | 1       | palliative     |                   | 17                            | Died of disease   | 17                               |
| pfg025T     | Exome sequencing | 95                | M   | 64  | negative                | MSS                                            | negative                                   | antrum     | poor                  | intestinal                 | IIIA                          | T3      | 1       | 0       | palliative     |                   | 9                             | Died of disease   | 16                               |
| pfg029T     | Exome sequencing | 80                | M   | 64  | negative                | MSS                                            | positive                                   | antrum     | moderate              | intestinal                 | II                            | T2b     | 1       | 0       | curative       | No recurrence     | 129                           | Alive or censored | 129                              |
| pfg036T     | Validation       | 85                | M   | 81  | positive                | MSS                                            | positive                                   | body       | poor                  | intestinal                 | IIIB                          | T3      | 2       | 0       | curative       | Recur             | 5                             | Died of disease   | 5                                |
| pfg062T     | Validation       | 90                | F   | 75  | positive                | MSS                                            | positive                                   | body       | poor                  | intestinal                 | IV                            | T4      | 2       | 0       | curative       | No recurrence     | 3                             | Alive or censored | 3                                |
| pfg088T     | Validation       | 85                | M   | 56  | positive                | MSS                                            | positive                                   | cardia     | poor                  | intestinal                 | IV                            | T4      | 2       | 0       | curative       | Recur             | 10                            | Died of disease   | 16                               |
| pfg043T     | Validation       | 80                | M   | 76  | positive                | MSS                                            | negative                                   | cardia     | poor                  | intestinal                 | IIIA                          | T3      | 1       | 0       | palliative     |                   | 120                           | Alive or censored | 120                              |
| SX125T      | Validation       | 90                | M   | 71  | positive                | MSS                                            | positive                                   | cardia     | moderate              | intestinal                 | IV                            | T4      | 1       | 0       | palliative     |                   | 1                             | Alive or censored | 1                                |
| SX318T      | Validation       | 90                | M   | 57  | positive                | MSS                                            | positive                                   | cardia     | poor                  | intestinal                 | IV                            | T3      | 3       | 1       | palliative     |                   | 8                             | Died of disease   | 15                               |
| pfg037T     | Validation       | 50                | M   | 77  | negative                | MSS                                            | negative                                   | cardia     | moderate              | intestinal                 | IV                            | T4      | 1       | 1       | palliative     |                   | 4                             | Died of disease   | 8                                |
| pfg046T     | Validation       | 60                | F   | 77  | negative                | MSS                                            | negative                                   | body       | poor                  | intestinal                 | IV                            | T4      | 1       | 0       | palliative     |                   | 10                            | Died of disease   | 12                               |
| pfg078T     | Validation       | 95                | M   | 71  | negative                | MSS                                            | negative                                   | cardia     | moderate              | intestinal                 | IB                            | T2b     | 0       | 0       | curative       | No recurrence     | 111                           | Alive or censored | 111                              |
| pfg040T     | Validation       | 90                | F   | 81  | negative                | MSI                                            | negative                                   | antrum     | moderate              | intestinal                 | II                            | T2b     | 1       | 0       | palliative     |                   | 37                            | Alive or censored | 37                               |
| pfg051T     | Validation       | 90                | F   | 75  | negative                | MSI                                            | negative                                   | antrum     | moderate              | intestinal                 | II                            | T3      | 0       | 0       | palliative     |                   | 8                             | Died of disease   | 8                                |
| pfg067T     | Validation       | 90                | F   | 72  | negative                | MSI                                            | negative                                   | body       | moderate              | intestinal                 | II                            | T2a     | 1       | 0       | curative       | No recurrence     | 138                           | Alive or censored | 138                              |
| pfg068T     | Validation       | 95                | F   | 74  | negative                | MSI                                            | negative                                   | antrum     | poor                  | intestinal                 | IIIA                          | T2b     | 2       | 0       | palliative     |                   | 7                             | Died of disease   | 13                               |
| SX186T      | Validation       | 90                | M   | 72  | negative                | MSI                                            | positive                                   | antrum     | moderate              | intestinal                 | II                            | T2b     | 1       | 0       | curative       | No recurrence     | 137                           | Alive or censored | 137                              |
| SX256T      | Validation       | 80                | F   | 81  | negative                | MSI                                            | negative                                   | antrum     | poor                  | intestinal                 | IB                            | T2b     | 0       | 0       | curative       | No recurrence     | 1                             | Alive or censored | 1                                |
| SX259T      | Validation       | 90                | M   | 82  | negative                | MSI                                            | positive                                   | antrum     | moderate              | intestinal                 | IIIA                          | T4      | 0       | 0       | curative       | No recurrence     | 87                            | Alive or censored | 87                               |
| pfg012T     | Validation       | 90                | F   | 73  | negative                | MSI                                            | positive                                   | antrum     | poor                  | indeterminate              | IIIA                          | T3      | 1       | 0       | curative       | Recur             | 15                            | Died of disease   | 20                               |
| pfg048T     | Validation       | 90                | F   | 72  | negative                | MSI                                            | positive                                   | antrum     | poor                  | intestinal                 | IIIA                          | T3      | 1       | 0       | palliative     |                   | 10                            | Died of disease   | 16                               |
| pfg057T     | Validation       | 90                | F   | 41  | negative                | MSI                                            | negative                                   | cardia     | poor                  | intestinal                 | IV                            | T2b     | 2       | 1       | palliative     |                   | 2                             | Died of disease   | 3                                |
| pfg070T     | Validation       | 75                | M   | 74  | negative                | MSI                                            | positive                                   | antrum     | well                  | intestinal                 | IIIA                          | T3      | 1       | 0       | palliative     |                   | 6                             | Died of disease   | 6                                |
| pfg083T     | Validation       | 80                | F   | 62  | negative                | MSI                                            | positive                                   | antrum     | poor                  | mixed                      | II                            | T3      | 0       | 0       | curative       | No recurrence     | 91                            | Alive or censored | 91                               |
| SX067T      | Validation       | 80                | M   | 79  | negative                | MSI                                            | negative                                   | body       | poor                  | intestinal                 | II                            | T2a     | 1       | 0       | curative       | No recurrence     | 52                            | Alive or censored | 52                               |

|         |            |    |   |    |          |     |          |         |          |                            |      |     |   |   |            |               |     |                   |     |
|---------|------------|----|---|----|----------|-----|----------|---------|----------|----------------------------|------|-----|---|---|------------|---------------|-----|-------------------|-----|
| SX100T  | Validation | 95 | F | 79 | negative | MSI | positive | antrum  | moderate | intestinal                 | II   | T2a | 1 | 0 | curative   | No recurrence | 2   | Alive or censored | 2   |
| pfg060T | Validation | 90 | F | 83 | negative | MSS | positive | cardia  | moderate | intestinal                 | IIIA | T2b | 2 | 0 | palliative |               | 10  | Died of disease   | 14  |
| pfg090T | Validation | 90 | M | 72 | positive | MSS | negative | antrum  | poor     | intestinal                 | IB   | T2a | 0 | 0 | curative   | No recurrence | 84  | Alive or censored | 84  |
| SX115T  | Validation | 90 | M | 68 | positive | MSS | positive | body    | poor     | intestinal                 | IV   | T3  | 3 | 1 | palliative |               | 6   | Died of disease   | 10  |
| SX165T  | Validation | 95 | M | 46 | positive | MSS | positive | body    | moderate | intestinal                 | IV   | T3  | 3 | 0 | curative   | Recur         | 66  | Died of disease   | 77  |
| SX388T  | Validation | 90 | F | 77 | positive | MSS | positive | body    | poor     | intestinal                 | IB   | T2a | 0 | 0 | curative   | No recurrence | 60  | Alive or censored | 105 |
| pfg061T | Validation | 70 | M | 77 | negative | MSI | positive | antrum  | moderate | intestinal                 | IB   | T2b | 0 | 0 | curative   | No recurrence | 139 | Alive or censored | 139 |
| pfg049T | Validation | 90 | F | 80 | negative | MSI | negative | antrum  | moderate | intestinal                 | II   | T2b | 1 | 0 | curative   | No recurrence | 58  | Alive or censored | 58  |
| pfg071T | Validation | 95 | F | 75 | negative | MSI | negative | cardia  | poor     | intestinal                 | II   | T2b | 1 | 0 | curative   | No recurrence | 21  | Alive or censored | 21  |
| pfg077T | Validation | 70 | M | 76 | negative | MSI | positive | cardia  | poor     | mixed                      | IIIA | T3  | 1 | 0 | palliative |               | 10  | Died of disease   | 10  |
| SX041T  | Validation | 50 | F | 79 | negative | MSI | positive | antrum  | poor     | mixed                      | IB   | T2a | 0 | 0 | curative   | No recurrence | 58  | Alive or censored | 58  |
| SX190T  | Validation | 60 | M | 51 | positive | MSS | negative | body    | poor     | mixed                      | IV   | T4  | 2 | 0 | curative   | No recurrence | 8   | Alive or censored | 8   |
| SX394T  | Validation | 70 | M | 70 | positive | MSS | negative | body    | poor     | intestinal                 | II   | T2a | 1 | 0 | curative   | No recurrence | 104 | Alive or censored | 104 |
| pfg013T | Validation | 80 | M | 60 | negative | MSS | positive | cardia  | moderate | intestinal                 | IV   | T4  | 3 | 0 | palliative |               | 9   | Died of disease   | 20  |
| pfg023T | Validation | 95 | F | 65 | negative | MSS | negative | body    | poor     | mixed                      | IIIB | T3  | 2 | 0 | palliative |               | 7   | Died of disease   | 7   |
| pfg026T | Validation | 60 | M | 58 | negative | MSS | positive | body    | moderate | intestinal                 | IIIA | T3  | 1 | 0 | curative   | Recur         | 32  | Died of disease   | 37  |
| pfg027T | Validation | 80 | M | 62 | negative | MSS | positive | antrum  | moderate | intestinal                 | IIIA | T4  | 0 | 0 | curative   | Recur         | 30  | Died of disease   | 41  |
| pfg028T | Validation | 85 | M | 75 | negative | MSS | negative | cardia  | poor     | intestinal                 | IIIA | T3  | 1 | 0 | curative   | No recurrence | 145 | Alive or censored | 145 |
| pfg030T | Validation | 80 | F | 74 | negative | MSS | negative | antrum  | moderate | intestinal                 | IIIA | T2b | 2 | 0 | palliative |               | 8   | Died of disease   | 12  |
| pfg032T | Validation | 90 | M | 84 | negative | MSS | positive | antrum  | poor     | intestinal                 | IV   | T3  | 3 | 0 | palliative |               | 23  | Died of disease   | 23  |
| pfg033T | Validation | 80 | M | 70 | negative | MSS | positive | antrum  | poor     | diffuse (signet ring cell) | II   | T3  | 0 | 0 | curative   | No recurrence | 71  | Alive or censored | 71  |
| pfg034T | Validation | 85 | M | 63 | negative | MSS | negative | antrum  | poor     | mixed                      | IV   | T2a | 3 | 0 | palliative |               | 18  | Died of disease   | 21  |
| pfg035T | Validation | 70 | M | 74 | negative | MSS | positive | cardia  | moderate | intestinal                 | IV   | T4  | 1 | 0 | palliative |               | 13  | Died of disease   | 20  |
| pfg038T | Validation | 90 | M | 67 | negative | MSS | negative | antrum  | moderate | intestinal                 | IV   | T4  | 2 | 0 | palliative |               | 6   | Died of disease   | 6   |
| pfg041T | Validation | 70 | M | 76 | negative | MSS | positive | cardia  | poor     | mixed                      | IIIB | T3  | 2 | 0 | palliative |               | 7   | Died of disease   | 7   |
| pfg042T | Validation | 80 | F | 74 | negative | MSS | positive | antrum  | moderate | intestinal                 | IV   | T3  | 1 | 1 | palliative |               | 44  | Died of disease   | 44  |
| pfg044T | Validation | 80 | F | 69 | negative | MSS | negative | cardia  | moderate | intestinal                 | IIIA | T3  | 1 | 0 | palliative |               | 4   | Died of disease   | 5   |
| pfg045T | Validation | 50 | F | 74 | negative | MSS | negative | antrum  | poor     | diffuse                    | IIIA | T3  | 1 | 0 | curative   | Recur         | 3   | Died of disease   | 4   |
| pfg047T | Validation | 95 | M | 81 | negative | MSS | positive | cardia  | poor     | intestinal                 | IV   | T3  | 1 | 1 | palliative |               | 6   | Died of disease   | 6   |
| pfg050T | Validation | 80 | M | 61 | negative | MSS | negative | antrum  | poor     | diffuse                    | IIIB | T3  | 2 | 0 | palliative |               | 4   | Died of disease   | 5   |
| pfg052T | Validation | 80 | M | 70 | negative | MSS | positive | body    | moderate | intestinal                 | IIIA | T3  | 1 | 0 | curative   | Recur         | 11  | Died of disease   | 14  |
| pfg053T | Validation | 90 | M | 80 | negative | MSS | negative | cardia  | poor     | intestinal                 | IB   | T2b | 0 | 0 | curative   | Recur         | 42  | Died of disease   | 42  |
| pfg054T | Validation | 90 | M | 72 | negative | MSS | positive | antrum  | moderate | intestinal                 | IV   | T4  | 2 | 0 | palliative |               | 32  | Died of disease   | 42  |
| pfg055T | Validation | 70 | M | 73 | negative | MSS | positive | antrum  | moderate | intestinal                 | IIIB | T3  | 2 | 0 | curative   | Recur         | 18  | Died of disease   | 29  |
| pfg056T | Validation | 85 | M | 73 | negative | MSS | positive | cardia  | moderate | intestinal                 | IB   | T2b | 0 | 0 | curative   | No recurrence | 111 | Alive or censored | 111 |
| pfg058T | Validation | 80 | M | 59 | negative | MSS | positive | antrum  | moderate | intestinal                 | IIIB | T3  | 2 | 0 | palliative |               | 5   | Died of disease   | 10  |
| pfg063T | Validation | 80 | M | 61 | negative | MSS | positive | antrum  | moderate | intestinal                 | IIIA | T3  | 1 | 0 | curative   | Recur         | 13  | Died of disease   | 31  |
| pfg064T | Validation | 70 | F | 84 | negative | MSS | negative | body    | poor     | diffuse                    | IV   | T3  | 3 | 0 | curative   | No recurrence | 9   | Alive or censored | 9   |
| pfg065T | Validation | 60 | M | 84 | negative | MSS | positive | cardia  | moderate | intestinal                 | IIIA | T3  | 1 | 0 | curative   | Recur         | 7   | Died of disease   | 11  |
| pfg066T | Validation | 70 | M | 51 | negative | MSS | positive | antrum  | moderate | intestinal                 | II   | T2b | 1 | 0 | curative   | No recurrence | 138 | Alive or censored | 138 |
| pfg069T | Validation | 80 | F | 72 | negative | MSS | negative | cardia  | poor     | intestinal                 | IIIA | T3  | 1 | 0 | palliative |               | 3   | Died of disease   | 4   |
| pfg072T | Validation | 90 | M | 78 | negative | MSS | positive | antrum  | moderate | intestinal                 | IV   | T3  | 2 | 1 | palliative |               | 19  | Died of disease   | 26  |
| pfg073T | Validation | 60 | F | 63 | negative | MSS | negative | antrum  | poor     | diffuse                    | IIIA | T2b | 2 | 0 | curative   | Recur         | 48  | Died of disease   | 61  |
| pfg075T | Validation | 90 | M | 60 | negative | MSS | negative | cardia  | moderate | intestinal                 | IB   | T1  | 1 | 0 | curative   | No recurrence | 117 | Alive or censored | 117 |
| pfg076T | Validation | 80 | F | 88 | negative | MSS | positive | antrum  | moderate | intestinal                 | II   | T3  | 0 | 0 | curative   | No recurrence | 89  | Alive or censored | 89  |
| pfg079T | Validation | 60 | F | 43 | negative | MSS | negative | body    | poor     | diffuse                    | IIIA | T3  | 1 | 0 | curative   | Recur         | 9   | Died of disease   | 17  |
| pfg080T | Validation | 80 | M | 78 | negative | MSS | negative | body    | poor     | intestinal                 | IV   | T3  | 3 | 1 | palliative |               | 3   | Alive or censored | 3   |
| pfg081T | Validation | 95 | M | 72 | negative | MSS | positive | antrum  | poor     | intestinal                 | IV   | T4  | 3 | 0 | curative   | Recur         | 2   | Died of disease   | 9   |
| pfg082T | Validation | 90 | M | 72 | negative | MSS | negative | cardia  | poor     | intestinal                 | IV   | T3  | 2 | 1 | palliative |               | 2   | Died of disease   | 4   |
| pfg084T | Validation | 90 | M | 53 | negative | MSS | positive | cardia  | moderate | intestinal                 | IB   | T2b | 0 | 0 | curative   | No recurrence | 89  | Alive or censored | 89  |
| pfg085T | Validation | 90 | M | 85 | negative | MSS | negative | body    | moderate | intestinal                 | IB   | T2b | 0 | 0 | curative   | No recurrence | 81  | Alive or censored | 81  |
| pfg086T | Validation | 80 | M | 74 | negative | MSS | negative | cardia  | poor     | intestinal                 | II   | T2b | 1 | 0 | palliative |               | 8   | Died of disease   | 20  |
| pfg087T | Validation | 90 | M | 35 | negative | MSS | negative | cardia  | poor     | intestinal                 | IB   | T2b | 0 | 0 | curative   | No recurrence | 91  | Alive or censored | 91  |
| pfg089T | Validation | 60 | M | 66 | negative | MSS | positive | body    | poor     | mixed                      | IV   | T3  | 2 | 1 | palliative |               | 57  | Died of disease   | 65  |
| pfg091T | Validation | 70 | F | 67 | negative | MSS | positive | diffuse | poor     | diffuse (signet ring cell) | IV   | T3  | 3 | 0 | curative   | Recur         | 8   | Died of disease   | 14  |
| pfg092T | Validation | 95 | M | 72 | negative | MSS | negative | cardia  | moderate | intestinal                 | IA   | T1  | 0 | 0 | curative   | No recurrence | 82  | Alive or censored | 82  |
| pfg093T | Validation | 95 | M | 23 | negative | MSS | negative | cardia  | poor     | intestinal                 | II   | T2a | 1 | 0 | curative   | No recurrence | 94  | Alive or censored | 94  |



|                |            |    |   |    |          |     |          |         |          |            |      |     |   |   |            |       |    |                   |    |
|----------------|------------|----|---|----|----------|-----|----------|---------|----------|------------|------|-----|---|---|------------|-------|----|-------------------|----|
| <b>pfg094T</b> | Validation | 65 | F | 52 | negative | MSS | negative | diffuse | poor     | diffuse    | IIIB | T3  | 2 | 0 | curative   | Recur | 10 | Died of disease   | 14 |
| <b>pfg095T</b> | Validation | 60 | M | 70 | negative | MSS | negative | body    | poor     | intestinal | IV   | T4  | 1 | 0 | palliative |       | 4  | Alive or censored | 4  |
| <b>pfg096T</b> | Validation | 70 | M | 78 | negative | MSS | negative | antrum  | moderate | intestinal | IIIA | T2b | 2 | 0 | curative   | Recur | 13 | Died of disease   | 14 |
| <b>pfg097T</b> | Validation | 50 | F | 74 | negative | MSS | negative | body    | poor     | diffuse    | IV   | T4  | 3 | 0 | curative   | Recur | 1  | Died of disease   | 14 |
| <b>pfg098T</b> | Validation | 65 | F | 39 | negative | MSS | negative | antrum  | poor     | intestinal | IIIB | T3  | 2 | 0 | curative   | Recur | 14 | Died of disease   | 29 |
| <b>pfg099T</b> | Validation | 98 | M | 62 | negative | MSS | positive | antrum  | poor     | intestinal | IV   | T3  | 3 | 1 | palliative |       | 9  | Died of disease   | 16 |
| <b>pfg100T</b> | Validation | 80 | M | 82 | negative | MSS | negative | cardia  | poor     | intestinal | IV   | T3  | 1 | 1 | palliative |       | 2  | Died of disease   | 3  |
| <b>pfg101T</b> | Validation | 70 | M | 70 | negative | MSS | positive | cardia  | poor     | diffuse    | IIIB | T3  | 2 | 0 | curative   | Recur | 8  | Died of disease   | 9  |

<sup>a</sup>EBV status is defined by in-situ-hybridisation showing tumor cell specific expression of EBER

<sup>b</sup>MSI denotes high-level microsatellite instability; MSS denotes either microsatellite stable or low-level microsatellite instability

<sup>c</sup>Helicobacter pylori status is defined by its presence in gastrectomy specimen or endoscopic gastric biopsy preceding surgery

<sup>d</sup>Staging is according to UICC TNM classification 6th Edition 2002

**Supplementary Table 2 Summary of whole exome sequencing statistics for the discovery cohort. Genotyping concordance is calculated on all markers on the array that has a GenCall score  $\geq 0.15$  and are covered in the sequencing data with more than the equivalent of three Q30 bases.**

| Sample         | Phase | Tissue | Read length | Total raw sequencing yield (bp) | Total PF reads     | % duplicate read pairs | Total uniquely mapped reads | % reads in targeted regions +/-100bp (min fraction: 0.5) | Mean coverage | Median coverage | $\geq 1X$    | $\geq 10X$   | $\geq 30X$   | $\geq 50X$   | $\geq 100X$  | Genotyping concordance with Omni1-Quad BeadArray |
|----------------|-------|--------|-------------|---------------------------------|--------------------|------------------------|-----------------------------|----------------------------------------------------------|---------------|-----------------|--------------|--------------|--------------|--------------|--------------|--------------------------------------------------|
| pfg001N        | 1     | N      | 75          | 8,770,644,000                   | 115,403,280        | 4.3%                   | 99,347,657                  | 60.7%                                                    | 80.9          | 67              | 93.2%        | 84.7%        | 71.2%        | 59.2%        | 33.8%        | 99.6%                                            |
| pfg001T        | 1     | T      | 75          | 7,959,616,000                   | 104,731,680        | 5.0%                   | 89,134,121                  | 61.7%                                                    | 75.6          | 60              | 98.1%        | 90.3%        | 72.9%        | 57.2%        | 26.1%        | 99.0%                                            |
| pfg002N        | 1     | N      | 75          | 7,672,940,000                   | 100,959,840        | 4.9%                   | 85,842,578                  | 60.2%                                                    | 68.7          | 57              | 96.2%        | 87.7%        | 69.9%        | 54.8%        | 25.3%        | 99.6%                                            |
| pfg002T        | 1     | T      | 75          | 7,783,392,000                   | 102,413,040        | 4.4%                   | 88,127,719                  | 57.9%                                                    | 68.3          | 55              | 98.3%        | 89.8%        | 70.3%        | 53.4%        | 23.3%        | 98.6%                                            |
| pfg003N        | 1     | N      | 75          | 8,074,218,000                   | 106,239,840        | 4.0%                   | 91,459,025                  | 58.7%                                                    | 71.8          | 60              | 94.6%        | 85.8%        | 69.8%        | 56.1%        | 28.0%        | 99.6%                                            |
| pfg003T        | 1     | T      | 75          | 9,671,160,000                   | 127,252,080        | 4.7%                   | 109,332,982                 | 57.7%                                                    | 84.3          | 67              | 97.9%        | 89.1%        | 72.2%        | 59.3%        | 33.9%        | 99.2%                                            |
| pfg005N        | 1     | N      | 75          | 8,329,064,000                   | 109,593,120        | 4.4%                   | 93,853,623                  | 60.4%                                                    | 76.0          | 65              | 94.1%        | 86.3%        | 72.5%        | 59.0%        | 30.2%        | 99.6%                                            |
| pfg005T        | 1     | T      | 75          | 8,149,656,000                   | 107,232,480        | 4.7%                   | 91,264,936                  | 62.2%                                                    | 76.6          | 63              | 98.1%        | 90.7%        | 73.9%        | 58.5%        | 28.4%        | 99.6%                                            |
| pfg006N        | 1     | N      | 75          | 8,196,594,000                   | 107,850,000        | 4.5%                   | 91,856,656                  | 54.6%                                                    | 65.9          | 54              | 97.6%        | 88.8%        | 69.5%        | 52.8%        | 22.3%        | 99.6%                                            |
| pfg006T        | 1     | T      | 75          | 8,441,936,000                   | 95,930,880         | 4.6%                   | 81,867,485                  | 66.1%                                                    | 72.2          | 56              | 98.0%        | 88.3%        | 69.5%        | 53.9%        | 25.6%        | 99.4%                                            |
| pfg007N        | 1     | N      | 75          | 9,089,964,000                   | 119,604,720        | 6.0%                   | 100,773,009                 | 59.5%                                                    | 80.8          | 64              | 97.1%        | 88.6%        | 71.6%        | 58.1%        | 32.2%        | 99.5%                                            |
| pfg007T        | 1     | T      | 75          | 7,841,860,000                   | 96,562,320         | 5.5%                   | 80,600,296                  | 63.8%                                                    | 68.3          | 52              | 97.9%        | 87.7%        | 67.5%        | 50.8%        | 22.7%        | 99.3%                                            |
| pfg008N        | 1     | N      | 75          | 8,768,710,000                   | 115,377,840        | 7.6%                   | 95,226,295                  | 58.3%                                                    | 72.7          | 57              | 96.0%        | 86.8%        | 68.7%        | 54.1%        | 26.7%        | 99.5%                                            |
| pfg008T        | 1     | T      | 75          | 7,956,486,000                   | 104,690,640        | 7.6%                   | 86,427,141                  | 63.3%                                                    | 73.3          | 59              | 97.1%        | 88.4%        | 70.6%        | 55.7%        | 27.0%        | 99.5%                                            |
| pfg009N        | 1     | N      | 75          | 8,660,716,000                   | 113,956,800        | 4.7%                   | 96,719,769                  | 58.9%                                                    | 76.0          | 61              | 97.9%        | 89.4%        | 71.5%        | 56.7%        | 28.6%        | 99.6%                                            |
| pfg009T        | 1     | T      | 75          | 8,185,490,000                   | 107,703,840        | 8.4%                   | 88,331,375                  | 66.8%                                                    | 78.7          | 60              | 97.8%        | 88.0%        | 69.7%        | 55.6%        | 29.6%        | 99.5%                                            |
| pfg010N        | 1     | N      | 75          | 8,632,244,000                   | 113,582,400        | 3.9%                   | 97,518,432                  | 60.1%                                                    | 79.1          | 67              | 96.7%        | 89.5%        | 73.9%        | 60.1%        | 31.7%        | 99.6%                                            |
| pfg010T        | 1     | T      | 75          | 9,658,924,000                   | 127,091,040        | 5.3%                   | 107,287,194                 | 65.6%                                                    | 94.7          | 76              | 96.1%        | 89.2%        | 76.0%        | 64.1%        | 38.0%        | 99.2%                                            |
| pfg011N        | 1     | N      | 75          | 15,970,628,000                  | 210,140,160        | 4.2%                   | 177,388,028                 | 58.1%                                                    | 138.3         | 110             | 98.5%        | 94.2%        | 83.5%        | 73.9%        | 53.5%        | 99.6%                                            |
| pfg011T        | 1     | T      | 75          | 17,426,842,000                  | 229,300,560        | 6.5%                   | 189,867,761                 | 62.0%                                                    | 158.1         | 125             | 98.4%        | 93.7%        | 84.0%        | 75.4%        | 57.5%        | 98.8%                                            |
| pfg014G        | 2     | N      | 75          | 13,539,154,000                  | 178,146,752        | 11.1%                  | 143,427,621                 | 64.1%                                                    | 157.5         | 114             | 98.3%        | 93.2%        | 82.1%        | 72.6%        | 54.0%        | 99.6%                                            |
| pfg014T        | 2     | T      | 75          | 13,908,096,000                  | 183,001,216        | 7.5%                   | 152,340,189                 | 51.5%                                                    | 124.6         | 93              | 98.5%        | 93.8%        | 81.7%        | 70.2%        | 46.8%        | 99.2%                                            |
| pfg015G        | 2     | N      | 75          | 11,843,810,000                  | 155,839,552        | 10.1%                  | 127,118,454                 | 67.8%                                                    | 144.8         | 109             | 98.2%        | 92.9%        | 81.4%        | 71.7%        | 52.8%        | 99.6%                                            |
| pfg015T        | 2     | T      | 75          | 15,171,146,000                  | 199,620,288        | 4.8%                   | 171,905,345                 | 48.7%                                                    | 123.6         | 93              | 98.2%        | 91.8%        | 78.2%        | 67.4%        | 47.4%        | 99.6%                                            |
| pfg016G        | 2     | N      | 75          | 14,220,888,000                  | 187,116,928        | 6.3%                   | 160,055,671                 | 63.7%                                                    | 158.6         | 114             | 98.5%        | 93.0%        | 81.2%        | 71.5%        | 53.7%        | 99.6%                                            |
| pfg016T        | 2     | T      | 75          | 13,004,148,000                  | 171,107,200        | 4.3%                   | 148,077,823                 | 49.1%                                                    | 113.0         | 85              | 98.4%        | 92.1%        | 78.0%        | 66.2%        | 44.2%        | 99.6%                                            |
| pfg017G        | 2     | N      | 75          | 12,055,940,000                  | 158,630,784        | 10.7%                  | 128,740,246                 | 69.2%                                                    | 147.3         | 108             | 98.3%        | 92.7%        | 80.8%        | 70.8%        | 52.2%        | 99.6%                                            |
| pfg017T        | 2     | T      | 75          | 16,696,310,000                  | 219,688,256        | 8.6%                   | 179,266,022                 | 51.3%                                                    | 141.4         | 112             | 98.5%        | 93.6%        | 82.5%        | 73.0%        | 53.8%        | 99.6%                                            |
| pfg018G        | 2     | N      | 75          | 14,584,252,000                  | 191,898,048        | 5.8%                   | 164,963,622                 | 65.7%                                                    | 169.7         | 120             | 98.4%        | 93.0%        | 81.7%        | 72.3%        | 55.1%        | 99.6%                                            |
| pfg018T        | 2     | T      | 75          | 13,718,686,000                  | 180,508,992        | 5.4%                   | 154,497,400                 | 49.3%                                                    | 117.5         | 93              | 98.6%        | 93.8%        | 81.7%        | 70.3%        | 47.0%        | 99.5%                                            |
| pfg019G        | 2     | N      | 75          | 14,501,480,000                  | 190,808,896        | 10.7%                  | 155,311,626                 | 72.7%                                                    | 160.2         | 118             | 98.5%        | 93.6%        | 82.4%        | 72.9%        | 55.0%        | 99.7%                                            |
| pfg019T        | 2     | T      | 75          | 16,055,844,000                  | 211,261,120        | 9.1%                   | 171,184,417                 | 51.2%                                                    | 135.4         | 109             | 98.6%        | 94.4%        | 84.0%        | 74.2%        | 53.1%        | 99.5%                                            |
| pfg020G        | 2     | N      | 75          | 15,094,106,000                  | 198,606,656        | 3.7%                   | 173,664,649                 | 57.5%                                                    | 149.6         | 107             | 98.6%        | 93.5%        | 81.8%        | 71.5%        | 51.9%        | 99.6%                                            |
| pfg020T        | 2     | T      | 75          | 15,469,006,000                  | 203,539,520        | 6.2%                   | 173,104,487                 | 53.7%                                                    | 134.7         | 107             | 98.7%        | 95.0%        | 85.4%        | 75.2%        | 52.4%        | 98.8%                                            |
| pfg021G        | 2     | N      | 75          | 14,424,806,000                  | 189,800,064        | 4.6%                   | 165,047,708                 | 59.0%                                                    | 152.5         | 105             | 98.2%        | 91.0%        | 77.6%        | 67.8%        | 51.1%        | 99.6%                                            |
| pfg021T        | 2     | T      | 75          | 13,476,904,000                  | 177,327,680        | 6.1%                   | 151,235,241                 | 53.4%                                                    | 126.5         | 96              | 98.5%        | 93.6%        | 81.7%        | 70.5%        | 48.1%        | 99.1%                                            |
| pfg022G        | 2     | N      | 75          | 16,002,760,000                  | 210,562,560        | 9.1%                   | 173,797,199                 | 66.6%                                                    | 189.3         | 139             | 98.6%        | 94.9%        | 85.8%        | 77.4%        | 60.2%        | 99.6%                                            |
| pfg022T        | 2     | T      | 75          | 17,033,108,000                  | 224,119,808        | 10.8%                  | 176,966,759                 | 50.0%                                                    | 146.6         | 109             | 98.4%        | 93.6%        | 82.8%        | 72.8%        | 52.8%        | 99.3%                                            |
| pfg024G        | 2     | N      | 75          | 13,088,068,000                  | 172,211,392        | 7.8%                   | 144,589,918                 | 70.4%                                                    | 155.7         | 121             | 98.6%        | 94.9%        | 85.3%        | 76.0%        | 56.5%        | 99.7%                                            |
| pfg024T        | 2     | T      | 75          | 13,412,996,000                  | 176,486,784        | 5.3%                   | 151,433,688                 | 50.7%                                                    | 111.3         | 85              | 98.4%        | 92.6%        | 79.1%        | 67.1%        | 43.8%        | 99.5%                                            |
| pfg025G        | 2     | N      | 75          | 15,706,254,000                  | 206,661,248        | 3.8%                   | 182,058,799                 | 58.9%                                                    | 162.9         | 115             | 98.6%        | 93.6%        | 81.8%        | 72.0%        | 54.0%        | 99.6%                                            |
| pfg025T        | 2     | T      | 75          | 12,932,678,000                  | 170,166,784        | 5.9%                   | 145,548,949                 | 49.5%                                                    | 115.8         | 88              | 98.4%        | 92.5%        | 79.1%        | 67.4%        | 45.0%        | 99.5%                                            |
| pfg029G        | 2     | N      | 75          | 15,524,396,000                  | 204,268,352        | 5.7%                   | 176,476,707                 | 64.1%                                                    | 167.6         | 119             | 98.5%        | 93.8%        | 82.6%        | 72.9%        | 55.1%        | 99.6%                                            |
| pfg029T        | 2     | T      | 75          | 15,039,294,000                  | 197,885,440        | 6.4%                   | 162,649,521                 | 52.6%                                                    | 130.0         | 102             | 98.8%        | 96.1%        | 87.5%        | 76.7%        | 50.8%        | 99.1%                                            |
| <b>Average</b> |       |        |             | <b>12,085,118,500</b>           | <b>158,520,020</b> | <b>6.3%</b>            | <b>133,538,367</b>          | <b>59.3%</b>                                             | <b>115.8</b>  | <b>89</b>       | <b>97.8%</b> | <b>91.4%</b> | <b>77.6%</b> | <b>65.7%</b> | <b>42.3%</b> | <b>99.5%</b>                                     |

**Supplementary Table 3 Sequenom validation results for whole exome sequencing predicted somatic SNVs and somatic indels.** Sequenom MassARRAY genotyping assays were performed on 472 predicted somatic SNVs and 189 somatic indels in the corresponding tumor and match normal samples. Due to the single base extension chemistry, assays for indels only confirm the presence or absence of the predicted indel, but cannot define the sequence within the indel (the actual indel sequences in the table under "Normal call" and "Tumor call" were added based on whole-exome sequencing results for clarity purpose). Position": 1-indexed position of the somatic SNV event, or 1-indexed start position of the indel event. "Mutation type": S - single nucleotide variants; D - small deletions; I - small insertions. "Normal match": "Y" if the Sequenom call agrees with the exome-seq prediction in the normal sample; "N" otherwise; "Tumor match": "Y" if the Sequenom call agrees with the exome-seq prediction in the tumor sample; "N" otherwise; "Somatic match": "Y" if Sequenom calls in both tumor and the matched normal agree with the exome-seq prediction; "N" otherwise. Please see Supplementary Methods for details on the the Sequenom assays and genotyping call method.

| Sample  | Chromosome | Position  | Whole-exome sequencing     |                  |               | Sequenom confirmation |                          |                            | Normal match | Tumor match | Somatic match |
|---------|------------|-----------|----------------------------|------------------|---------------|-----------------------|--------------------------|----------------------------|--------------|-------------|---------------|
|         |            |           | Ref/Mut (exome-seq)        | Mutatnt zygosity | Mutation type | Mutation length       | Normal call (sequenom)   | Tumor call (sequenom)      |              |             |               |
| pfg001T | 15         | 26054233  | CCCCAACTCCCATCTTCTGCCTCA/- | het              | D             | 25                    | CCCCAACTCCCATCTTCTGCCTCA | CCCCAACTCCCATCTTCTGCCTCA/- | Y            | Y           | Y             |
| pfg002T | 18         | 46838582  | TT/-                       | het              | D             | 2                     | TT                       | TT/-                       | Y            | Y           | Y             |
| pfg003T | 14         | 52411670  | A/-                        | het              | D             | 1                     | A                        | A/-                        | Y            | Y           | Y             |
| pfg006T | 2          | 227868309 | ACATTTTCAAGGAGAGAAA/-      | het              | D             | 19                    | ACATTTTCAAGGAGAGAAA      | ACATTTTCAAGGAGAGAAA/-      | Y            | Y           | Y             |
| pfg006T | 5          | 112203650 | C/-                        | het              | D             | 1                     | C                        | C/-                        | Y            | Y           | Y             |
| pfg006T | 6          | 149316689 | T/-                        | het              | D             | 1                     | T                        | T/-                        | Y            | Y           | Y             |
| pfg006T | 7          | 32994706  | A/-                        | het              | D             | 1                     | A                        | A/-                        | Y            | Y           | Y             |
| pfg006T | 7          | 136958780 | ACCAGG/-                   | het              | D             | 6                     | ACCAGG                   | ACCAGG/-                   | Y            | Y           | Y             |
| pfg006T | 18         | 21869113  | A/-                        | het              | D             | 1                     | A                        | A/-                        | Y            | Y           | Y             |
| pfg007T | 4          | 124038270 | CA/-                       | het              | D             | 2                     | CA                       | CA/-                       | Y            | Y           | Y             |
| pfg007T | 13         | 35308281  | GAAAGAATCATTAAATAC/-       | het              | D             | 17                    | GAAAGAATCATTAAATAC       | GAAAGAATCATTAAATAC/-       | Y            | Y           | Y             |
| pfg008T | 1          | 7996842   | T/-                        | het              | D             | 1                     | T                        | T/-                        | Y            | Y           | Y             |
| pfg008T | 1          | 25539617  | A/-                        | het              | D             | 1                     | A                        | A/-                        | Y            | Y           | Y             |
| pfg008T | 1          | 26965338  | G/-                        | het              | D             | 1                     | G                        | G/-                        | Y            | Y           | Y             |
| pfg008T | 1          | 62863524  | A/-                        | het              | D             | 1                     | A                        | A/-                        | Y            | Y           | Y             |
| pfg008T | 1          | 86013964  | T/-                        | het              | D             | 1                     | T                        | T/-                        | Y            | Y           | Y             |
| pfg008T | 1          | 116923874 | C/-                        | het              | D             | 1                     | C                        | C/-                        | Y            | Y           | Y             |
| pfg008T | 1          | 117840984 | A/-                        | het              | D             | 1                     | A                        | A/-                        | Y            | Y           | Y             |
| pfg008T | 1          | 152562404 | T/-                        | het              | D             | 1                     | T                        | T/-                        | Y            | Y           | Y             |
| pfg008T | 1          | 198860665 | T/-                        | het              | D             | 1                     | T                        | T/-                        | Y            | Y           | Y             |
| pfg008T | 1          | 199093643 | A/-                        | het              | D             | 1                     | A                        | A/-                        | Y            | Y           | Y             |
| pfg008T | 2          | 42525179  | A/-                        | het              | D             | 1                     | A                        | A/-                        | Y            | Y           | Y             |
| pfg008T | 2          | 43900583  | C/-                        | het              | D             | 1                     | C                        | C/-                        | Y            | Y           | Y             |
| pfg008T | 2          | 95178762  | T/-                        | het              | D             | 1                     | T                        | T/-                        | Y            | Y           | Y             |
| pfg008T | 2          | 118295255 | A/-                        | het              | D             | 1                     | A                        | A/-                        | Y            | Y           | Y             |
| pfg008T | 2          | 170514775 | A/-                        | het              | D             | 1                     | A                        | A/-                        | Y            | Y           | Y             |
| pfg008T | 2          | 201145249 | T/-                        | het              | D             | 1                     | T                        | T/-                        | Y            | Y           | Y             |
| pfg008T | 2          | 202327632 | G/-                        | het              | D             | 1                     | G                        | G/-                        | Y            | Y           | Y             |
| pfg008T | 2          | 203469082 | CCTCTACAGCAGTGTAGGG/-      | het              | D             | 19                    | CCTCTACAGCAGTGTAGGG      | CCTCTACAGCAGTGTAGGG/-      | Y            | Y           | Y             |
| pfg008T | 2          | 205874543 | A/-                        | het              | D             | 1                     | A                        | A/-                        | Y            | Y           | Y             |
| pfg008T | 2          | 210595925 | T/-                        | het              | D             | 1                     | T                        | T/-                        | Y            | Y           | Y             |
| pfg008T | 2          | 230867269 | A/-                        | het              | D             | 1                     | A                        | A/-                        | Y            | Y           | Y             |
| pfg008T | 3          | 38924445  | T/-                        | het              | D             | 1                     | T                        | T/-                        | Y            | Y           | Y             |
| pfg008T | 3          | 56642137  | TCT/-                      | het              | D             | 3                     | TCT                      | TCT/-                      | Y            | Y           | Y             |
| pfg008T | 3          | 113782546 | T/-                        | het              | D             | 1                     | T                        | T/-                        | Y            | Y           | Y             |
| pfg008T | 3          | 130638238 | T/-                        | het              | D             | 1                     | T/-                      | T/-                        | N            | Y           | N             |
| pfg008T | 3          | 134788171 | A/-                        | het              | D             | 1                     | A                        | A/-                        | Y            | Y           | Y             |
| pfg008T | 3          | 143513333 | T/-                        | het              | D             | 1                     | T                        | T/-                        | Y            | Y           | Y             |
| pfg008T | 3          | 180952846 | A/-                        | het              | D             | 1                     | A                        | A/-                        | Y            | Y           | Y             |
| pfg008T | 3          | 182148922 | A/-                        | het              | D             | 1                     | A                        | A/-                        | Y            | Y           | Y             |
| pfg008T | 3          | 197683519 | T/-                        | het              | D             | 1                     | T                        | T/-                        | Y            | Y           | Y             |
| pfg008T | 4          | 22055831  | A/-                        | het              | D             | 1                     | A                        | A/-                        | Y            | Y           | Y             |
| pfg008T | 4          | 70655434  | T/-                        | het              | D             | 1                     | T                        | T/-                        | Y            | Y           | Y             |
| pfg008T | 4          | 126617972 | A/-                        | het              | D             | 1                     | A                        | A/-                        | Y            | Y           | Y             |
| pfg008T | 4          | 128784160 | A/-                        | het              | D             | 1                     | A                        | A/-                        | Y            | Y           | Y             |
| pfg008T | 4          | 155939830 | G/-                        | het              | D             | 1                     | G                        | G/-                        | Y            | Y           | Y             |
| pfg008T | 4          | 160487596 | T/-                        | het              | D             | 1                     | T                        | T/-                        | Y            | Y           | Y             |
| pfg008T | 5          | 72235301  | T/-                        | het              | D             | 1                     | T                        | T/-                        | Y            | Y           | Y             |
| pfg008T | 5          | 80006671  | A/-                        | het              | D             | 1                     | A                        | A/-                        | Y            | Y           | Y             |
| pfg008T | 5          | 94843971  | T/-                        | het              | D             | 1                     | T                        | T/-                        | Y            | Y           | Y             |
| pfg008T | 5          | 98234309  | T/-                        | het              | D             | 1                     | T                        | T/-                        | Y            | Y           | Y             |
| pfg008T | 5          | 140482671 | A/-                        | het              | D             | 1                     | A                        | A/-                        | Y            | Y           | Y             |
| pfg008T | 5          | 176640436 | A/-                        | het              | D             | 1                     | A                        | A/-                        | Y            | Y           | Y             |
| pfg008T | 6          | 10665228  | A/-                        | het              | D             | 1                     | A                        | A/-                        | Y            | Y           | Y             |
| pfg008T | 6          | 38924418  | A/-                        | het              | D             | 1                     | A                        | A/-                        | Y            | Y           | Y             |
| pfg008T | 6          | 39688971  | A/-                        | het              | D             | 1                     | A                        | A/-                        | Y            | Y           | Y             |
| pfg008T | 6          | 74408311  | A/-                        | het              | D             | 1                     | A                        | A/-                        | Y            | Y           | Y             |
| pfg008T | 6          | 74551833  | T/-                        | het              | D             | 1                     | T                        | T/-                        | Y            | Y           | Y             |
| pfg008T | 6          | 131522969 | A/-                        | het              | D             | 1                     | A                        | A/-                        | Y            | Y           | Y             |
| pfg008T | 6          | 139139023 | A/-                        | het              | D             | 1                     | A                        | A/-                        | Y            | Y           | Y             |
| pfg008T | 6          | 146912403 | A/-                        | het              | D             | 1                     | A                        | A/-                        | Y            | Y           | Y             |
| pfg008T | 6          | 162126924 | G/-                        | het              | D             | 1                     | G                        | G/-                        | Y            | Y           | Y             |

|         |    |           |                       |     |   |    |                     |                       |   |   |   |
|---------|----|-----------|-----------------------|-----|---|----|---------------------|-----------------------|---|---|---|
| pfg008T | 7  | 77261396  | T/-                   | het | D | 1  | T                   | T/-                   | Y | Y | Y |
| pfg008T | 7  | 86816416  | A/-                   | het | D | 1  | A                   | A/-                   | Y | Y | Y |
| pfg008T | 7  | 91708362  | T/-                   | het | D | 1  | T                   | T/-                   | Y | Y | Y |
| pfg008T | 7  | 104910046 | T/-                   | het | D | 1  | T                   | T/-                   | Y | Y | Y |
| pfg008T | 7  | 115381893 | T/-                   | het | D | 1  | T                   | T/-                   | Y | Y | Y |
| pfg008T | 7  | 136351148 | A/-                   | het | D | 1  | A                   | A/-                   | Y | Y | Y |
| pfg008T | 7  | 142322616 | C/-                   | het | D | 1  | C                   | C/-                   | Y | Y | Y |
| pfg008T | 8  | 28725769  | GT/-                  | het | D | 2  | GT                  | GT/-                  | Y | Y | Y |
| pfg008T | 8  | 38306379  | T/-                   | het | D | 1  | T                   | T/-                   | Y | Y | Y |
| pfg008T | 8  | 49046532  | A/-                   | het | D | 1  | A                   | A/-                   | Y | Y | Y |
| pfg008T | 8  | 68254679  | A/-                   | het | D | 1  | A                   | A/-                   | Y | Y | Y |
| pfg008T | 8  | 103358525 | T/-                   | het | D | 1  | T/-                 | T/-                   | N | Y | N |
| pfg008T | 8  | 113554049 | T/-                   | het | D | 1  | T                   | T/-                   | Y | Y | Y |
| pfg008T | 8  | 124734062 | C/-                   | het | D | 1  | C                   | C/-                   | Y | Y | Y |
| pfg008T | 9  | 111210462 | T/-                   | het | D | 1  | T                   | T/-                   | Y | Y | Y |
| pfg008T | 9  | 116706227 | T/-                   | het | D | 1  | T                   | T/-                   | Y | Y | Y |
| pfg008T | 9  | 130059211 | A/-                   | het | D | 1  | A                   | A/-                   | Y | Y | Y |
| pfg008T | 10 | 7860860   | T/-                   | het | D | 1  | T                   | T/-                   | Y | Y | Y |
| pfg008T | 10 | 13736458  | G/-                   | het | D | 1  | G                   | G/-                   | Y | Y | Y |
| pfg008T | 10 | 25926983  | A/-                   | het | D | 1  | A                   | A/-                   | Y | Y | Y |
| pfg008T | 10 | 91488215  | A/-                   | het | D | 1  | A                   | A/-                   | Y | Y | Y |
| pfg008T | 10 | 97436867  | A/-                   | het | D | 1  | A                   | A/-                   | Y | Y | Y |
| pfg008T | 10 | 97437020  | C/-                   | het | D | 1  | C                   | C/-                   | Y | Y | Y |
| pfg008T | 10 | 112323484 | T/-                   | het | D | 1  | T                   | T/-                   | Y | Y | Y |
| pfg008T | 11 | 31434487  | T/-                   | het | D | 1  | T                   | T/-                   | Y | Y | Y |
| pfg008T | 11 | 32594096  | T/-                   | het | D | 1  | T                   | T/-                   | Y | Y | Y |
| pfg008T | 11 | 93126562  | A/-                   | het | D | 1  | A                   | A/-                   | Y | Y | Y |
| pfg008T | 11 | 93134358  | T/-                   | het | D | 1  | T                   | T/-                   | Y | Y | Y |
| pfg008T | 11 | 101442485 | T/-                   | het | D | 1  | T                   | T/-                   | Y | Y | Y |
| pfg008T | 11 | 110931201 | A/-                   | het | D | 1  | A                   | A/-                   | Y | Y | Y |
| pfg008T | 11 | 124476392 | A/-                   | het | D | 1  | A                   | A/-                   | Y | Y | Y |
| pfg008T | 12 | 19405785  | A/-                   | het | D | 1  | A                   | A/-                   | Y | Y | Y |
| pfg008T | 12 | 54045459  | T/-                   | het | D | 1  | T                   | T/-                   | Y | Y | Y |
| pfg008T | 12 | 57570840  | CCAGCCCTAGA/-         | het | D | 11 | CCAGCCCTAGA         | CCAGCCCTAGA/-         | Y | Y | Y |
| pfg008T | 12 | 63920957  | A/-                   | het | D | 1  | A                   | A/-                   | Y | Y | Y |
| pfg008T | 13 | 44431635  | T/-                   | het | D | 1  | T                   | T/-                   | Y | Y | Y |
| pfg008T | 13 | 45441576  | G/-                   | het | D | 1  | G                   | G/-                   | Y | Y | Y |
| pfg008T | 13 | 50837973  | T/-                   | het | D | 1  | T                   | T/-                   | Y | Y | Y |
| pfg008T | 14 | 49311030  | A/-                   | het | D | 1  | A                   | A/-                   | Y | Y | Y |
| pfg008T | 14 | 49676411  | A/-                   | het | D | 1  | A                   | A/-                   | Y | Y | Y |
| pfg008T | 14 | 54888308  | T/-                   | het | D | 1  | T                   | T/-                   | Y | Y | Y |
| pfg008T | 14 | 57884204  | A/-                   | het | D | 1  | A                   | A/-                   | Y | Y | Y |
| pfg008T | 14 | 63554140  | A/-                   | het | D | 1  | A                   | A/-                   | Y | Y | Y |
| pfg008T | 14 | 63558457  | A/-                   | het | D | 1  | A                   | A/-                   | Y | Y | Y |
| pfg008T | 14 | 91985193  | T/-                   | het | D | 1  | T                   | T/-                   | Y | Y | Y |
| pfg008T | 15 | 19870388  | G/-                   | het | D | 1  | G                   | G/-                   | Y | Y | Y |
| pfg008T | 15 | 40530249  | A/-                   | het | D | 1  | A                   | A/-                   | Y | Y | Y |
| pfg008T | 15 | 48010720  | A/-                   | het | D | 1  | A                   | A/-                   | Y | Y | Y |
| pfg008T | 15 | 57351797  | A/-                   | het | D | 1  | A                   | A/-                   | Y | Y | Y |
| pfg008T | 15 | 89111212  | A/-                   | het | D | 1  | A                   | A/-                   | Y | Y | Y |
| pfg008T | 16 | 2753494   | TCAC/-                | het | D | 4  | TCAC                | TCAC/-                | Y | Y | Y |
| pfg008T | 16 | 75913812  | A/-                   | het | D | 1  | A                   | A/-                   | Y | Y | Y |
| pfg008T | 17 | 32654606  | A/-                   | het | D | 1  | A                   | A/-                   | Y | Y | Y |
| pfg008T | 17 | 34819192  | TACTGAAATAA/-         | het | D | 11 | TACTGAAATAA         | TACTGAAATAA/-         | Y | Y | Y |
| pfg008T | 17 | 52383015  | T/-                   | het | D | 1  | T                   | T/-                   | Y | Y | Y |
| pfg008T | 18 | 17408748  | T/-                   | het | D | 1  | T                   | T/-                   | Y | Y | Y |
| pfg008T | 18 | 37883560  | A/-                   | het | D | 1  | A                   | A/-                   | Y | Y | Y |
| pfg008T | 18 | 55164174  | T/-                   | het | D | 1  | T                   | T/-                   | Y | Y | Y |
| pfg008T | 19 | 7908975   | T/-                   | het | D | 1  | T                   | T/-                   | Y | Y | Y |
| pfg008T | 19 | 62338199  | T/-                   | het | D | 1  | T                   | T/-                   | Y | Y | Y |
| pfg008T | 19 | 62339269  | T/-                   | het | D | 1  | T                   | T/-                   | Y | Y | Y |
| pfg008T | 21 | 18588619  | T/-                   | het | D | 1  | T                   | T/-                   | Y | Y | Y |
| pfg008T | 21 | 36524696  | C/-                   | het | D | 1  | C                   | C/-                   | Y | Y | Y |
| pfg008T | X  | 32376567  | T/-                   | het | D | 1  | T                   | T/-                   | Y | Y | Y |
| pfg008T | X  | 83014703  | A/-                   | het | D | 1  | A                   | A/-                   | Y | Y | Y |
| pfg008T | X  | 105952069 | T/-                   | het | D | 1  | T                   | T/-                   | Y | Y | Y |
| pfg009T | 1  | 118375862 | TTC/-                 | het | D | 3  | TTC                 | TTC/-                 | Y | Y | Y |
| pfg009T | 2  | 157890221 | TTCTCTGAC/-           | het | D | 11 | TTCTCTGAC           | TTCTCTGAC/-           | Y | Y | Y |
| pfg009T | 2  | 201565901 | CCAATACTATTCTGA/-     | het | D | 14 | CCAATACTATTCTGA     | CCAATACTATTCTGA/-     | Y | Y | Y |
| pfg009T | 7  | 6475916   | AATAAAAGAAAAACACCAG/- | het | D | 20 | AATAAAAGAAAAACACCAG | AATAAAAGAAAAACACCAG/- | Y | Y | Y |
| pfg009T | 7  | 24685403  | TA/-                  | het | D | 2  | TA                  | TA/-                  | Y | Y | Y |
| pfg009T | 14 | 49311035  | AATC/-                | het | D | 4  | AATC                | AATC/-                | Y | Y | Y |
| pfg009T | 19 | 39402288  | AG/-                  | het | D | 2  | AG                  | AG/-                  | Y | Y | Y |
| pfg009T | 21 | 37444339  | AAGT/-                | het | D | 4  | AAGT                | AAGT/-                | Y | Y | Y |
| pfg010T | 1  | 154163099 | G/-                   | het | D | 1  | G                   | G/-                   | Y | Y | Y |
| pfg010T | 3  | 2919711   | A/-                   | het | D | 1  | A                   | A                     | Y | N | N |
| pfg010T | 10 | 29796660  | TG/-                  | het | D | 2  | TG                  | TG/-                  | Y | Y | Y |
| pfg010T | 14 | 102872850 | CATGAGGCGAATAAGCTG/-  | het | D | 18 | CATGAGGCGAATAAGCTG  | CATGAGGCGAATAAGCTG    | Y | N | N |
| pfg010T | X  | 50394015  | TCC/-                 | het | D | 3  | TCC                 | TCC/-                 | Y | Y | Y |
| pfg011T | 11 | 125274521 | AGA/-                 | het | D | 3  | AGA                 | AGA/-                 | Y | Y | Y |
| pfg011T | 15 | 33061643  | AT/-                  | het | D | 2  | AT                  | AT/-                  | Y | Y | Y |
| pfg001T | 1  | 245835691 | -/T                   | het | I | 1  | -                   | -/T                   | Y | Y | Y |

|         |    |           |         |     |   |   |    |         |   |   |   |
|---------|----|-----------|---------|-----|---|---|----|---------|---|---|---|
| pfg001T | 14 | 49187735  | -/A     | het | I | 1 | -  | -/A     | Y | Y | Y |
| pfg003T | 8  | 38110166  | -/A     | het | I | 1 | -  | -/A     | Y | Y | Y |
| pfg005T | 12 | 6053020   | -/A     | het | I | 1 | -  | -/A     | Y | Y | Y |
| pfg007T | 6  | 12229214  | -/A     | het | I | 1 | -  | -/A     | Y | Y | Y |
| pfg007T | 7  | 50099857  | -/A     | het | I | 1 | -  | -/A     | Y | Y | Y |
| pfg007T | 10 | 123799948 | -/T     | het | I | 1 | -  | -/T     | Y | Y | Y |
| pfg007T | 14 | 72534787  | -/AT    | hom | I | 2 | -  | -/AT    | Y | Y | Y |
| pfg007T | X  | 76831035  | -/G     | het | I | 1 | -  | -/G     | Y | Y | Y |
| pfg008T | 1  | 89043123  | -/T     | het | I | 1 | -  | -/T     | Y | Y | Y |
| pfg008T | 1  | 113438872 | -/T     | het | I | 1 | -  | -/T     | Y | Y | Y |
| pfg008T | 1  | 153222980 | -/C     | het | I | 1 | -  | -/C     | Y | Y | Y |
| pfg008T | 1  | 240031085 | -/C     | het | I | 1 | -  | -/C     | Y | Y | Y |
| pfg008T | 2  | 48455596  | -/A     | het | I | 1 | -  | -/A     | Y | Y | Y |
| pfg008T | 2  | 131954695 | -/G     | het | I | 1 | -  | -/G     | Y | Y | Y |
| pfg008T | 2  | 169429652 | -/A     | het | I | 1 | -  | -/A     | Y | Y | Y |
| pfg008T | 4  | 56874260  | -/A     | het | I | 1 | -  | -/A     | Y | Y | Y |
| pfg008T | 4  | 83567649  | -/T     | het | I | 1 | -  | -/T     | Y | Y | Y |
| pfg008T | 6  | 99962736  | -/T     | het | I | 1 | -  | -/T     | Y | Y | Y |
| pfg008T | 6  | 111321458 | -/T     | het | I | 1 | -  | -/T     | Y | Y | Y |
| pfg008T | 6  | 142441690 | -/C     | het | I | 1 | -  | -/C     | Y | Y | Y |
| pfg008T | 8  | 134328061 | -/T     | het | I | 1 | -  | -/T     | Y | Y | Y |
| pfg008T | 10 | 50360764  | -/C     | het | I | 1 | -  | -/C     | Y | Y | Y |
| pfg008T | 10 | 89707750  | -/A     | het | I | 1 | -  | -/A     | Y | Y | Y |
| pfg008T | 10 | 102738565 | -/GTCTT | het | I | 5 | -  | -/GTCTT | Y | Y | Y |
| pfg008T | 11 | 59331817  | -/T     | het | I | 1 | -  | -/T     | Y | Y | Y |
| pfg008T | 11 | 118559088 | -/G     | het | I | 1 | -  | -/G     | Y | Y | Y |
| pfg008T | 12 | 50120823  | -/A     | het | I | 1 | -  | -/A     | Y | Y | Y |
| pfg008T | 12 | 63103250  | -/A     | het | I | 1 | -  | -/A     | Y | Y | Y |
| pfg008T | 16 | 14253801  | -/C     | het | I | 1 | -  | -/C     | Y | Y | Y |
| pfg008T | 19 | 42336274  | -/T     | het | I | 1 | -  | -/T     | Y | Y | Y |
| pfg008T | 19 | 55554118  | -/C     | het | I | 1 | -  | -/C     | Y | Y | Y |
| pfg008T | 21 | 31996526  | -/T     | het | I | 1 | -  | -/T     | Y | Y | Y |
| pfg008T | X  | 131988079 | -/T     | het | I | 1 | -  | -/T     | Y | Y | Y |
| pfg009T | 10 | 70718465  | -/G     | het | I | 1 | -  | -/G     | Y | Y | Y |
| pfg009T | 12 | 94783997  | -/T     | het | I | 1 | -  | -/T     | Y | Y | Y |
| pfg010T | 1  | 115017252 | -/T     | het | I | 1 | -  | -/T     | Y | Y | Y |
| pfg010T | 5  | 162842208 | -/G     | het | I | 1 | -  | -/G     | Y | Y | Y |
| pfg010T | 7  | 82957434  | -/GCC   | het | I | 3 | -  | -/GCC   | Y | Y | Y |
| pfg010T | 16 | 24280245  | -/A     | het | I | 1 | -  | -/A     | Y | Y | Y |
| pfg011T | 4  | 170273976 | -/T     | het | I | 1 | -  | -/T     | Y | Y | Y |
| pfg011T | 5  | 111604317 | -/A     | het | I | 1 | -  | -/A     | Y | Y | Y |
| pfg011T | 6  | 111759659 | -/GCGT  | het | I | 4 | -  | -/GCGT  | Y | Y | Y |
| pfg011T | 6  | 133177863 | -/C     | het | I | 1 | -  | -/C     | Y | Y | Y |
| pfg011T | 10 | 22902417  | -/A     | het | I | 1 | -  | -/A     | Y | Y | Y |
| pfg011T | 18 | 30649871  | -/A     | het | I | 1 | -  | -/A     | Y | Y | Y |
| pfg001T | 1  | 24866005  | T/A     | het | S | 1 | T  | T       | Y | N | N |
| pfg001T | 1  | 68669602  | G/C     | het | S | 1 | G  | GC      | Y | Y | Y |
| pfg001T | 1  | 86813842  | A/C     | het | S | 1 | A  | CA      | Y | Y | Y |
| pfg001T | 1  | 115028497 | T/G     | het | S | 1 | T  | GT      | Y | Y | Y |
| pfg001T | 1  | 246268718 | T/A     | het | S | 1 | T  | AT      | Y | Y | Y |
| pfg001T | 2  | 73858982  | C/G     | het | S | 1 | C  | CG      | Y | Y | Y |
| pfg001T | 2  | 130629248 | A/G     | het | S | 1 | GA | GA      | N | Y | N |
| pfg001T | 2  | 192572086 | T/G     | het | S | 1 | T  | GT      | Y | Y | Y |
| pfg001T | 2  | 203819826 | C/G     | het | S | 1 | C  | GC      | Y | Y | Y |
| pfg001T | 3  | 103663834 | A/T     | het | S | 1 | A  | TA      | Y | Y | Y |
| pfg001T | 3  | 152633244 | C/T     | het | S | 1 | C  | CT      | Y | Y | Y |
| pfg001T | 4  | 5718145   | G/A     | het | S | 1 | G  | GA      | Y | Y | Y |
| pfg001T | 4  | 89602480  | A/G     | het | S | 1 | A  | GA      | Y | Y | Y |
| pfg001T | 5  | 54676116  | G/C     | het | S | 1 | G  | CG      | Y | Y | Y |
| pfg001T | 5  | 128984304 | G/A     | het | S | 1 | G  | GA      | Y | Y | Y |
| pfg001T | 5  | 140553133 | C/T     | het | S | 1 | C  | CT      | Y | Y | Y |
| pfg001T | 5  | 140994570 | G/A     | het | S | 1 | G  | AG      | Y | Y | Y |
| pfg001T | 5  | 176495526 | C/T     | het | S | 1 | C  | CT      | Y | Y | Y |
| pfg001T | 6  | 50919016  | A/G     | het | S | 1 | A  | AG      | Y | Y | Y |
| pfg001T | 7  | 92808816  | G/A     | het | S | 1 | G  | GA      | Y | Y | Y |
| pfg001T | 8  | 26557429  | G/T     | het | S | 1 | G  | GT      | Y | Y | Y |
| pfg001T | 8  | 113392467 | G/A     | het | S | 1 | G  | GA      | Y | Y | Y |
| pfg001T | 9  | 16426138  | C/T     | het | S | 1 | C  | CT      | Y | Y | Y |
| pfg001T | 9  | 74721841  | C/A     | het | S | 1 | C  | C       | Y | N | N |
| pfg001T | 9  | 74757693  | T/G     | het | S | 1 | T  | T       | Y | N | N |
| pfg001T | 9  | 132952773 | G/A     | het | S | 1 | G  | GA      | Y | Y | Y |
| pfg001T | 10 | 61501858  | T/A     | het | S | 1 | T  | AT      | Y | Y | Y |
| pfg001T | 10 | 84108522  | C/T     | het | S | 1 | C  | TC      | Y | Y | Y |
| pfg001T | 10 | 127412194 | C/T     | het | S | 1 | C  | TC      | Y | Y | Y |
| pfg001T | 11 | 46706282  | C/T     | het | S | 1 | C  | CT      | Y | Y | Y |
| pfg001T | 11 | 55078681  | T/A     | het | S | 1 | T  | TA      | Y | Y | Y |
| pfg001T | 11 | 65948880  | G/C     | het | S | 1 | G  | GC      | Y | Y | Y |
| pfg001T | 11 | 73313316  | A/T     | het | S | 1 | A  | AT      | Y | Y | Y |
| pfg001T | 11 | 123945308 | T/G     | het | S | 1 | T  | GT      | Y | Y | Y |
| pfg001T | 12 | 6505869   | C/T     | het | S | 1 | C  | CT      | Y | Y | Y |
| pfg001T | 12 | 12993782  | C/T     | het | S | 1 | C  | CT      | Y | Y | Y |
| pfg001T | 13 | 77372663  | A/C     | het | S | 1 | A  | CA      | Y | Y | Y |

|         |    |           |     |     |   |   |   |    |   |   |   |
|---------|----|-----------|-----|-----|---|---|---|----|---|---|---|
| pfg001T | 13 | 100593470 | G/A | het | S | 1 | G | G  | Y | N | N |
| pfg001T | 14 | 44044386  | C/A | het | S | 1 | C | CA | Y | Y | Y |
| pfg001T | 14 | 93826180  | G/A | het | S | 1 | G | GA | Y | Y | Y |
| pfg001T | 14 | 94034196  | T/C | het | S | 1 | T | CT | Y | Y | Y |
| pfg001T | 15 | 32871719  | A/C | het | S | 1 | A | CA | Y | Y | Y |
| pfg001T | 15 | 32872918  | A/C | het | S | 1 | A | A  | Y | N | N |
| pfg001T | 15 | 33617864  | C/T | het | S | 1 | C | CT | Y | Y | Y |
| pfg001T | 15 | 40529403  | G/A | het | S | 1 | G | GA | Y | Y | Y |
| pfg001T | 15 | 48331928  | G/A | het | S | 1 | G | AG | Y | Y | Y |
| pfg001T | 15 | 54510898  | C/G | het | S | 1 | C | GC | Y | Y | Y |
| pfg001T | 15 | 60766249  | G/A | het | S | 1 | G | GA | Y | Y | Y |
| pfg001T | 15 | 88147933  | G/A | het | S | 1 | G | GA | Y | Y | Y |
| pfg001T | 17 | 36229326  | T/C | het | S | 1 | T | TC | Y | Y | Y |
| pfg001T | 17 | 36273542  | G/A | het | S | 1 | G | GA | Y | Y | Y |
| pfg001T | 18 | 7878344   | C/T | het | S | 1 | C | CT | Y | Y | Y |
| pfg001T | 18 | 27308247  | G/A | het | S | 1 | G | GA | Y | Y | Y |
| pfg001T | 18 | 59805274  | T/G | het | S | 1 | T | GT | Y | Y | Y |
| pfg001T | 18 | 68356992  | A/G | het | S | 1 | A | A  | Y | N | N |
| pfg001T | 20 | 4653396   | G/A | het | S | 1 | G | AG | Y | Y | Y |
| pfg001T | 20 | 19625476  | C/T | het | S | 1 | C | TC | Y | Y | Y |
| pfg001T | 20 | 51304500  | G/T | het | S | 1 | G | GT | Y | Y | Y |
| pfg002T | 1  | 218901836 | G/A | het | S | 1 | G | AG | Y | Y | Y |
| pfg002T | 1  | 235116231 | C/A | het | S | 1 | C | CA | Y | Y | Y |
| pfg002T | 2  | 165891626 | G/C | het | S | 1 | G | GC | Y | Y | Y |
| pfg002T | 2  | 212697780 | A/T | het | S | 1 | A | AT | Y | Y | Y |
| pfg002T | 3  | 173648352 | G/A | het | S | 1 | G | AG | Y | Y | Y |
| pfg002T | 4  | 110968636 | C/T | het | S | 1 | C | CT | Y | Y | Y |
| pfg002T | 5  | 3652422   | C/T | het | S | 1 | C | CT | Y | Y | Y |
| pfg002T | 5  | 101862432 | C/T | het | S | 1 | C | TC | Y | Y | Y |
| pfg002T | 6  | 43596096  | G/A | het | S | 1 | G | AG | Y | Y | Y |
| pfg002T | 7  | 134544962 | C/T | het | S | 1 | C | CT | Y | Y | Y |
| pfg002T | 8  | 19407271  | C/T | het | S | 1 | C | CT | Y | Y | Y |
| pfg002T | 9  | 703252    | G/A | het | S | 1 | G | GA | Y | Y | Y |
| pfg002T | 10 | 44806460  | A/G | het | S | 1 | A | GA | Y | Y | Y |
| pfg002T | 10 | 98172451  | C/T | het | S | 1 | C | CT | Y | Y | Y |
| pfg002T | 11 | 20342482  | G/C | het | S | 1 | G | CG | Y | Y | Y |
| pfg002T | 11 | 129250455 | G/A | het | S | 1 | G | AG | Y | Y | Y |
| pfg002T | 12 | 25289551  | C/T | het | S | 1 | C | CT | Y | Y | Y |
| pfg002T | 14 | 71124923  | C/A | het | S | 1 | C | CA | Y | Y | Y |
| pfg002T | 19 | 36461425  | C/T | het | S | 1 | C | TC | Y | Y | Y |
| pfg002T | 19 | 49628346  | G/A | het | S | 1 | G | AG | Y | Y | Y |
| pfg002T | 19 | 54384132  | G/A | het | S | 1 | G | AG | Y | Y | Y |
| pfg002T | 22 | 40853788  | G/A | het | S | 1 | G | AG | Y | Y | Y |
| pfg002T | 22 | 49248600  | C/T | het | S | 1 | C | CT | Y | Y | Y |
| pfg003T | 1  | 26967035  | T/A | het | S | 1 | T | TA | Y | Y | Y |
| pfg003T | 1  | 75457603  | G/A | het | S | 1 | G | GA | Y | Y | Y |
| pfg003T | 2  | 170136683 | T/G | het | S | 1 | T | GT | Y | Y | Y |
| pfg003T | 3  | 49703637  | G/A | het | S | 1 | G | GA | Y | Y | Y |
| pfg003T | 3  | 140560531 | G/A | het | S | 1 | G | GA | Y | Y | Y |
| pfg003T | 5  | 137763520 | A/G | het | S | 1 | A | GA | Y | Y | Y |
| pfg003T | 5  | 179664387 | C/T | het | S | 1 | C | TC | Y | Y | Y |
| pfg003T | 6  | 46324548  | C/T | het | S | 1 | C | CT | Y | Y | Y |
| pfg003T | 6  | 168210307 | G/A | het | S | 1 | G | GA | Y | Y | Y |
| pfg003T | 8  | 133896275 | C/T | het | S | 1 | C | CT | Y | Y | Y |
| pfg003T | 9  | 136826792 | C/T | het | S | 1 | C | CT | Y | Y | Y |
| pfg003T | 12 | 6497095   | C/T | het | S | 1 | C | CT | Y | Y | Y |
| pfg003T | 12 | 39617738  | G/A | het | S | 1 | G | GA | Y | Y | Y |
| pfg003T | 12 | 100076160 | T/C | het | S | 1 | T | CT | Y | Y | Y |
| pfg003T | 12 | 121780190 | T/G | het | S | 1 | T | GT | Y | Y | Y |
| pfg003T | 16 | 54076809  | C/T | het | S | 1 | C | CT | Y | Y | Y |
| pfg003T | 16 | 70717373  | C/G | het | S | 1 | C | GC | Y | Y | Y |
| pfg003T | 19 | 12876462  | C/T | het | S | 1 | C | CT | Y | Y | Y |
| pfg003T | 19 | 46546089  | C/T | het | S | 1 | C | CT | Y | Y | Y |
| pfg003T | 19 | 62794448  | A/G | het | S | 1 | A | GA | Y | Y | Y |
| pfg005T | 1  | 173621829 | G/T | het | S | 1 | G | GT | Y | Y | Y |
| pfg005T | 3  | 44573763  | C/T | het | S | 1 | C | CT | Y | Y | Y |
| pfg005T | 14 | 88139080  | T/G | het | S | 1 | T | GT | Y | Y | Y |
| pfg005T | 18 | 347401    | T/C | het | S | 1 | T | T  | Y | N | N |
| pfg006T | 1  | 47284779  | G/A | het | S | 1 | G | GA | Y | Y | Y |
| pfg006T | 1  | 62836105  | G/C | het | S | 1 | G | GC | Y | Y | Y |
| pfg006T | 1  | 154548559 | T/G | het | S | 1 | T | GT | Y | Y | Y |
| pfg006T | 1  | 154981418 | G/T | het | S | 1 | G | GT | Y | Y | Y |
| pfg006T | 1  | 199284854 | C/T | het | S | 1 | C | CT | Y | Y | Y |
| pfg006T | 1  | 212236906 | C/A | het | S | 1 | C | CA | Y | Y | Y |
| pfg006T | 1  | 213326403 | C/T | het | S | 1 | C | CT | Y | Y | Y |
| pfg006T | 1  | 224192028 | C/A | het | S | 1 | C | CA | Y | Y | Y |
| pfg006T | 2  | 26852035  | C/T | het | S | 1 | C | CT | Y | Y | Y |
| pfg006T | 2  | 27444807  | T/C | het | S | 1 | T | CT | Y | Y | Y |
| pfg006T | 2  | 86134784  | C/T | het | S | 1 | C | CT | Y | Y | Y |
| pfg006T | 2  | 108452908 | C/G | het | S | 1 | C | CG | Y | Y | Y |
| pfg006T | 2  | 141175872 | G/A | het | S | 1 | G | GA | Y | Y | Y |
| pfg006T | 2  | 202278430 | C/T | het | S | 1 | C | CT | Y | Y | Y |

|        |    |           |     |     |   |   |   |    |   |   |   |
|--------|----|-----------|-----|-----|---|---|---|----|---|---|---|
| pf006T | 3  | 3091541   | T/G | het | S | 1 | T | GT | Y | Y | Y |
| pf006T | 3  | 10392120  | C/T | het | S | 1 | C | CT | Y | Y | Y |
| pf006T | 3  | 58055719  | G/T | het | S | 1 | G | GT | Y | Y | Y |
| pf006T | 3  | 102660586 | A/T | het | S | 1 | A | AT | Y | Y | Y |
| pf006T | 3  | 141377505 | C/A | het | S | 1 | C | CA | Y | Y | Y |
| pf006T | 3  | 152645406 | C/T | het | S | 1 | C | CT | Y | Y | Y |
| pf006T | 5  | 49759814  | C/T | het | S | 1 | C | CT | Y | Y | Y |
| pf006T | 5  | 115378965 | T/A | het | S | 1 | T | T  | Y | N | N |
| pf006T | 5  | 115378966 | C/T | het | S | 1 | C | C  | Y | N | N |
| pf006T | 6  | 26358734  | G/A | het | S | 1 | G | GA | Y | Y | Y |
| pf006T | 6  | 62815836  | A/G | het | S | 1 | A | GA | Y | Y | Y |
| pf006T | 6  | 127838595 | C/T | het | S | 1 | C | CT | Y | Y | Y |
| pf006T | 6  | 129755965 | C/T | het | S | 1 | C | TC | Y | Y | Y |
| pf006T | 7  | 3969003   | G/A | het | S | 1 | G | GA | Y | Y | Y |
| pf006T | 7  | 63804459  | C/T | het | S | 1 | C | TC | Y | Y | Y |
| pf006T | 7  | 121542412 | C/A | het | S | 1 | C | CA | Y | Y | Y |
| pf006T | 7  | 136350321 | G/A | het | S | 1 | G | AG | Y | Y | Y |
| pf006T | 7  | 146723713 | G/A | het | S | 1 | G | GA | Y | Y | Y |
| pf006T | 8  | 56867860  | G/T | het | S | 1 | G | GT | Y | Y | Y |
| pf006T | 8  | 79790027  | C/A | het | S | 1 | C | CA | Y | Y | Y |
| pf006T | 8  | 113668638 | C/A | het | S | 1 | C | CA | Y | Y | Y |
| pf006T | 8  | 133251794 | A/C | het | S | 1 | A | CA | Y | Y | Y |
| pf006T | 9  | 125173679 | G/A | het | S | 1 | G | AG | Y | Y | Y |
| pf006T | 10 | 35535908  | G/A | het | S | 1 | G | GA | Y | Y | Y |
| pf006T | 10 | 50354333  | C/A | het | S | 1 | C | CA | Y | Y | Y |
| pf006T | 10 | 89682878  | A/T | het | S | 1 | A | TA | Y | Y | Y |
| pf006T | 11 | 4551283   | C/T | het | S | 1 | C | TC | Y | Y | Y |
| pf006T | 11 | 6773085   | C/T | het | S | 1 | C | CT | Y | Y | Y |
| pf006T | 11 | 117848591 | C/T | het | S | 1 | C | TC | Y | Y | Y |
| pf006T | 12 | 7186774   | C/A | het | S | 1 | C | CA | Y | Y | Y |
| pf006T | 12 | 62775176  | C/A | het | S | 1 | C | CA | Y | Y | Y |
| pf006T | 13 | 110085830 | G/C | het | S | 1 | G | CG | Y | Y | Y |
| pf006T | 14 | 22953150  | G/A | het | S | 1 | G | AG | Y | Y | Y |
| pf006T | 14 | 38718317  | A/G | het | S | 1 | A | GA | Y | Y | Y |
| pf006T | 15 | 56254512  | C/T | het | S | 1 | C | CT | Y | Y | Y |
| pf006T | 16 | 65871678  | A/G | het | S | 1 | A | GA | Y | Y | Y |
| pf006T | 17 | 3161260   | C/T | het | S | 1 | C | TC | Y | Y | Y |
| pf006T | 17 | 27672133  | G/A | het | S | 1 | G | AG | Y | Y | Y |
| pf006T | 17 | 44938763  | C/T | het | S | 1 | C | CT | Y | Y | Y |
| pf006T | 17 | 75628456  | C/T | het | S | 1 | C | CT | Y | Y | Y |
| pf006T | 19 | 14737199  | C/T | het | S | 1 | C | CT | Y | Y | Y |
| pf006T | 20 | 59942553  | C/T | het | S | 1 | C | CT | Y | Y | Y |
| pf006T | X  | 34872165  | G/A | het | S | 1 | G | AG | Y | Y | Y |
| pf006T | X  | 65340030  | G/T | het | S | 1 | G | GT | Y | Y | Y |
| pf006T | X  | 83015083  | T/G | het | S | 1 | T | GT | Y | Y | Y |
| pf006T | X  | 123606738 | G/A | het | S | 1 | G | AG | Y | Y | Y |
| pf007T | 1  | 11777770  | G/A | het | S | 1 | G | AG | Y | Y | Y |
| pf007T | 1  | 28473214  | C/T | het | S | 1 | C | CT | Y | Y | Y |
| pf007T | 1  | 110268185 | C/T | het | S | 1 | C | CT | Y | Y | Y |
| pf007T | 1  | 111664527 | C/A | het | S | 1 | C | CA | Y | Y | Y |
| pf007T | 1  | 112800109 | G/T | het | S | 1 | G | GT | Y | Y | Y |
| pf007T | 1  | 115630311 | G/A | het | S | 1 | G | AG | Y | Y | Y |
| pf007T | 1  | 150550811 | T/C | het | S | 1 | T | CT | Y | Y | Y |
| pf007T | 1  | 156565367 | C/T | het | S | 1 | C | CT | Y | Y | Y |
| pf007T | 1  | 167776472 | A/G | het | S | 1 | A | GA | Y | Y | Y |
| pf007T | 1  | 184373613 | C/T | het | S | 1 | C | CT | Y | Y | Y |
| pf007T | 1  | 226649173 | G/C | het | S | 1 | G | CG | Y | Y | Y |
| pf007T | 1  | 244851468 | C/T | het | S | 1 | C | CT | Y | Y | Y |
| pf007T | 2  | 99003288  | T/G | het | S | 1 | T | GT | Y | Y | Y |
| pf007T | 2  | 102323697 | C/T | het | S | 1 | C | CT | Y | Y | Y |
| pf007T | 2  | 120823163 | G/A | het | S | 1 | G | GA | Y | Y | Y |
| pf007T | 2  | 148942850 | G/T | het | S | 1 | G | GT | Y | Y | Y |
| pf007T | 2  | 215573889 | A/G | het | S | 1 | A | GA | Y | Y | Y |
| pf007T | 3  | 27191024  | C/T | het | S | 1 | C | CT | Y | Y | Y |
| pf007T | 3  | 95262589  | C/T | het | S | 1 | C | CT | Y | Y | Y |
| pf007T | 4  | 6749541   | C/T | het | S | 1 | C | CT | Y | Y | Y |
| pf007T | 4  | 64957517  | G/C | het | S | 1 | G | GC | Y | Y | Y |
| pf007T | 5  | 75633013  | C/T | het | S | 1 | C | CT | Y | Y | Y |
| pf007T | 5  | 179128612 | C/G | het | S | 1 | C | CG | Y | Y | Y |
| pf007T | 6  | 43263159  | T/C | het | S | 1 | T | CT | Y | Y | Y |
| pf007T | 6  | 43279286  | C/T | het | S | 1 | C | TC | Y | Y | Y |
| pf007T | 6  | 152776245 | T/C | het | S | 1 | T | CT | Y | Y | Y |
| pf007T | 7  | 2241406   | C/T | het | S | 1 | C | CT | Y | Y | Y |
| pf007T | 7  | 4057945   | C/T | het | S | 1 | C | TC | Y | Y | Y |
| pf007T | 7  | 27153702  | G/A | het | S | 1 | G | GA | Y | Y | Y |
| pf007T | 7  | 36901033  | G/A | het | S | 1 | G | AG | Y | Y | Y |
| pf007T | 8  | 113387427 | T/A | het | S | 1 | T | TA | Y | Y | Y |
| pf007T | 8  | 139230098 | T/A | het | S | 1 | T | AT | Y | Y | Y |
| pf007T | 8  | 144883181 | G/A | het | S | 1 | G | GA | Y | Y | Y |
| pf007T | 9  | 34986541  | G/A | het | S | 1 | G | AG | Y | Y | Y |
| pf007T | 10 | 20493451  | G/T | het | S | 1 | G | GT | Y | Y | Y |
| pf007T | 11 | 120521563 | T/A | het | S | 1 | T | AT | Y | Y | Y |

|         |    |           |     |     |   |   |   |    |   |   |   |
|---------|----|-----------|-----|-----|---|---|---|----|---|---|---|
| pfg007T | 12 | 13417608  | C/T | het | S | 1 | C | TC | Y | Y | Y |
| pfg007T | 12 | 20657673  | C/T | het | S | 1 | C | CT | Y | Y | Y |
| pfg007T | 14 | 19833406  | G/C | het | S | 1 | G | G  | Y | N | N |
| pfg007T | 14 | 23793764  | C/T | het | S | 1 | C | TC | Y | Y | Y |
| pfg007T | 14 | 25987156  | G/C | het | S | 1 | G | CG | Y | Y | Y |
| pfg007T | 14 | 73893266  | G/T | het | S | 1 | G | GT | Y | Y | Y |
| pfg007T | 15 | 66276876  | C/T | het | S | 1 | C | TC | Y | Y | Y |
| pfg007T | 16 | 180565    | C/G | het | S | 1 | C | GC | Y | Y | Y |
| pfg007T | 17 | 71820651  | C/T | het | S | 1 | C | CT | Y | Y | Y |
| pfg007T | 18 | 29180289  | C/T | het | S | 1 | C | TC | Y | Y | Y |
| pfg007T | 19 | 8507417   | C/T | het | S | 1 | C | CT | Y | Y | Y |
| pfg007T | 19 | 63760252  | C/G | het | S | 1 | C | CG | Y | Y | Y |
| pfg007T | 21 | 31517614  | C/T | het | S | 1 | C | TC | Y | Y | Y |
| pfg007T | 22 | 22416573  | T/A | het | S | 1 | T | AT | Y | Y | Y |
| pfg007T | X  | 105755165 | A/G | het | S | 1 | A | GA | Y | Y | Y |
| pfg007T | X  | 144717017 | G/T | het | S | 1 | G | GT | Y | Y | Y |
| pfg008T | 1  | 75449800  | A/T | het | S | 1 | A | TA | Y | Y | Y |
| pfg008T | 1  | 156850708 | A/G | het | S | 1 | A | AG | Y | Y | Y |
| pfg008T | 1  | 156870994 | A/G | het | S | 1 | A | GA | Y | Y | Y |
| pfg008T | 1  | 212236722 | T/C | het | S | 1 | T | TC | Y | Y | Y |
| pfg008T | 2  | 71763226  | C/A | het | S | 1 | C | CA | Y | Y | Y |
| pfg008T | 3  | 58107762  | T/C | het | S | 1 | T | CT | Y | Y | Y |
| pfg008T | 3  | 151860639 | A/G | het | S | 1 | A | AG | Y | Y | Y |
| pfg008T | 4  | 57035263  | A/G | het | S | 1 | A | GA | Y | Y | Y |
| pfg008T | 5  | 115364721 | G/A | het | S | 1 | G | GA | Y | Y | Y |
| pfg008T | 5  | 129067937 | A/G | het | S | 1 | A | AG | Y | Y | Y |
| pfg008T | 7  | 121520425 | G/T | het | S | 1 | G | GT | Y | Y | Y |
| pfg008T | 7  | 121731189 | G/A | het | S | 1 | G | GA | Y | Y | Y |
| pfg008T | 8  | 18706539  | A/G | het | S | 1 | A | GA | Y | Y | Y |
| pfg008T | 8  | 133898876 | A/G | het | S | 1 | A | GA | Y | Y | Y |
| pfg008T | 9  | 34986664  | G/A | het | S | 1 | G | GA | Y | Y | Y |
| pfg008T | 9  | 118037497 | A/G | het | S | 1 | A | GA | Y | Y | Y |
| pfg008T | 10 | 127416545 | A/G | het | S | 1 | A | GA | Y | Y | Y |
| pfg008T | 10 | 127416552 | A/G | het | S | 1 | A | AG | Y | Y | Y |
| pfg008T | 11 | 66373992  | G/A | het | S | 1 | G | AG | Y | Y | Y |
| pfg008T | 11 | 111287465 | A/C | het | S | 1 | A | CA | Y | Y | Y |
| pfg008T | 12 | 76925278  | G/A | het | S | 1 | G | AG | Y | Y | Y |
| pfg008T | 14 | 63722891  | G/A | het | S | 1 | G | AG | Y | Y | Y |
| pfg008T | 15 | 47079368  | A/G | het | S | 1 | A | AG | Y | Y | Y |
| pfg008T | 16 | 20898196  | C/T | het | S | 1 | C | CT | Y | Y | Y |
| pfg008T | 18 | 39104616  | A/G | het | S | 1 | A | AG | Y | Y | Y |
| pfg008T | 18 | 39108280  | A/C | het | S | 1 | A | CA | Y | Y | Y |
| pfg008T | 19 | 14736412  | T/C | het | S | 1 | T | CT | Y | Y | Y |
| pfg008T | 19 | 62793820  | A/C | het | S | 1 | A | CA | Y | Y | Y |
| pfg008T | 20 | 20217454  | A/T | het | S | 1 | A | AT | Y | Y | Y |
| pfg008T | 20 | 59882332  | C/T | het | S | 1 | C | CT | Y | Y | Y |
| pfg009T | 1  | 59846090  | G/T | het | S | 1 | G | GT | Y | Y | Y |
| pfg009T | 1  | 149327390 | C/G | het | S | 1 | C | GC | Y | Y | Y |
| pfg009T | 1  | 154981491 | C/G | het | S | 1 | C | CG | Y | Y | Y |
| pfg009T | 1  | 178120470 | A/T | het | S | 1 | A | AT | Y | Y | Y |
| pfg009T | 1  | 180882550 | G/C | het | S | 1 | G | CG | Y | Y | Y |
| pfg009T | 1  | 233660732 | C/T | het | S | 1 | C | CT | Y | Y | Y |
| pfg009T | 1  | 245085669 | G/A | het | S | 1 | G | GA | Y | Y | Y |
| pfg009T | 2  | 8876304   | T/C | het | S | 1 | T | CT | Y | Y | Y |
| pfg009T | 2  | 53898594  | T/C | het | S | 1 | T | CT | Y | Y | Y |
| pfg009T | 2  | 71503605  | T/A | het | S | 1 | T | TA | Y | Y | Y |
| pfg009T | 2  | 96883014  | C/T | het | S | 1 | C | CT | Y | Y | Y |
| pfg009T | 2  | 150147000 | T/C | het | S | 1 | T | CT | Y | Y | Y |
| pfg009T | 2  | 170079721 | A/C | het | S | 1 | A | CA | Y | Y | Y |
| pfg009T | 2  | 196573812 | C/T | het | S | 1 | C | CT | Y | Y | Y |
| pfg009T | 2  | 228590627 | C/A | het | S | 1 | C | CA | Y | Y | Y |
| pfg009T | 3  | 1390376   | C/A | het | S | 1 | C | CA | Y | Y | Y |
| pfg009T | 3  | 41242304  | C/A | het | S | 1 | C | CA | Y | Y | Y |
| pfg009T | 3  | 43097497  | G/A | het | S | 1 | G | AG | Y | Y | Y |
| pfg009T | 3  | 47430697  | T/C | het | S | 1 | T | CT | Y | Y | Y |
| pfg009T | 3  | 52531903  | G/T | het | S | 1 | G | GT | Y | Y | Y |
| pfg009T | 3  | 52533177  | G/A | het | S | 1 | G | GA | Y | Y | Y |
| pfg009T | 3  | 151860601 | C/T | het | S | 1 | C | CT | Y | Y | Y |
| pfg009T | 3  | 170968107 | C/T | het | S | 1 | C | CT | Y | Y | Y |
| pfg009T | 3  | 175479822 | G/A | het | S | 1 | G | GA | Y | Y | Y |
| pfg009T | 3  | 185379484 | A/G | het | S | 1 | A | AG | Y | Y | Y |
| pfg009T | 4  | 35799320  | T/C | het | S | 1 | T | TC | Y | Y | Y |
| pfg009T | 4  | 46431934  | G/T | het | S | 1 | G | GT | Y | Y | Y |
| pfg009T | 4  | 77524521  | G/T | het | S | 1 | G | GT | Y | Y | Y |
| pfg009T | 5  | 21878110  | C/A | het | S | 1 | C | CA | Y | Y | Y |
| pfg009T | 5  | 140481864 | G/T | het | S | 1 | G | GT | Y | Y | Y |
| pfg009T | 5  | 141314954 | C/T | het | S | 1 | C | TC | Y | Y | Y |
| pfg009T | 5  | 147698347 | C/A | het | S | 1 | C | CA | Y | Y | Y |
| pfg009T | 5  | 176234061 | C/T | het | S | 1 | C | CT | Y | Y | Y |
| pfg009T | 6  | 43700266  | A/C | het | S | 1 | A | CA | Y | Y | Y |
| pfg009T | 6  | 56589017  | T/A | het | S | 1 | T | TA | Y | Y | Y |
| pfg009T | 6  | 73961181  | A/G | het | S | 1 | A | GA | Y | Y | Y |



|        |    |           |     |     |   |   |   |    |   |   |   |
|--------|----|-----------|-----|-----|---|---|---|----|---|---|---|
| pf009T | 6  | 74129218  | G/A | het | S | 1 | G | GA | Y | Y | Y |
| pf009T | 6  | 82984483  | T/C | het | S | 1 | T | CT | Y | Y | Y |
| pf009T | 7  | 56122787  | A/T | het | S | 1 | A | TA | Y | Y | Y |
| pf009T | 7  | 94719086  | G/A | het | S | 1 | G | AG | Y | Y | Y |
| pf009T | 7  | 112194684 | C/A | het | S | 1 | C | CA | Y | Y | Y |
| pf009T | 7  | 127763328 | C/T | het | S | 1 | C | CT | Y | Y | Y |
| pf009T | 7  | 139438108 | G/A | het | S | 1 | G | GA | Y | Y | Y |
| pf009T | 8  | 90995622  | T/C | het | S | 1 | T | CT | Y | Y | Y |
| pf009T | 9  | 115897413 | G/C | het | S | 1 | G | GC | Y | Y | Y |
| pf009T | 9  | 116838216 | T/C | het | S | 1 | T | CT | Y | Y | Y |
| pf009T | 9  | 118154827 | G/T | het | S | 1 | G | GT | Y | Y | Y |
| pf009T | 10 | 16982777  | G/A | het | S | 1 | G | AG | Y | Y | Y |
| pf009T | 10 | 23288007  | G/C | het | S | 1 | G | CG | Y | Y | Y |
| pf009T | 10 | 50336918  | A/G | het | S | 1 | A | GA | Y | Y | Y |
| pf009T | 10 | 61625917  | C/T | het | S | 1 | C | CT | Y | Y | Y |
| pf009T | 10 | 75237374  | G/A | het | S | 1 | G | GA | Y | Y | Y |
| pf009T | 10 | 115345472 | A/T | het | S | 1 | A | AT | Y | Y | Y |
| pf009T | 11 | 40093449  | T/C | het | S | 1 | T | CT | Y | Y | Y |
| pf009T | 11 | 46965433  | G/T | het | S | 1 | G | GT | Y | Y | Y |
| pf009T | 11 | 55189393  | T/A | het | S | 1 | T | AT | Y | Y | Y |
| pf009T | 11 | 56014624  | C/A | het | S | 1 | C | CA | Y | Y | Y |
| pf009T | 11 | 66374328  | T/G | het | S | 1 | T | GT | Y | Y | Y |
| pf009T | 11 | 118711383 | T/C | het | S | 1 | T | CT | Y | Y | Y |
| pf009T | 11 | 123129506 | C/A | het | S | 1 | C | CA | Y | Y | Y |
| pf009T | 11 | 123500213 | G/C | het | S | 1 | G | GC | Y | Y | Y |
| pf009T | 12 | 4790986   | G/T | het | S | 1 | G | GT | Y | Y | Y |
| pf009T | 12 | 11796691  | C/G | het | S | 1 | C | CG | Y | Y | Y |
| pf009T | 12 | 51795576  | G/T | het | S | 1 | G | GT | Y | Y | Y |
| pf009T | 12 | 53255178  | T/A | het | S | 1 | T | AT | Y | Y | Y |
| pf009T | 12 | 122367745 | C/T | het | S | 1 | C | CT | Y | Y | Y |
| pf009T | 12 | 132144535 | G/T | het | S | 1 | G | GT | Y | Y | Y |
| pf009T | 13 | 45436024  | A/G | het | S | 1 | A | GA | Y | Y | Y |
| pf009T | 13 | 101165938 | A/C | het | S | 1 | A | CA | Y | Y | Y |
| pf009T | 14 | 50518500  | T/C | het | S | 1 | T | CT | Y | Y | Y |
| pf009T | 14 | 63556509  | G/T | het | S | 1 | G | GT | Y | Y | Y |
| pf009T | 15 | 38700527  | A/T | het | S | 1 | A | AT | Y | Y | Y |
| pf009T | 15 | 56627861  | G/C | het | S | 1 | G | CG | Y | Y | Y |
| pf009T | 15 | 60006794  | T/G | het | S | 1 | T | GT | Y | Y | Y |
| pf009T | 15 | 73479533  | C/T | het | S | 1 | C | CT | Y | Y | Y |
| pf009T | 15 | 90448712  | C/T | het | S | 1 | C | CT | Y | Y | Y |
| pf009T | 15 | 98409419  | T/A | het | S | 1 | T | AT | Y | Y | Y |
| pf009T | 16 | 666834    | G/T | het | S | 1 | G | GT | Y | Y | Y |
| pf009T | 16 | 29913484  | C/T | het | S | 1 | C | CT | Y | Y | Y |
| pf009T | 16 | 65340611  | C/G | het | S | 1 | C | CG | Y | Y | Y |
| pf009T | 16 | 66419273  | A/C | het | S | 1 | A | CA | Y | Y | Y |
| pf009T | 17 | 37373951  | G/A | het | S | 1 | G | GA | Y | Y | Y |
| pf009T | 17 | 47065876  | C/T | het | S | 1 | C | CT | Y | Y | Y |
| pf009T | 18 | 32039235  | C/T | het | S | 1 | C | TC | Y | Y | Y |
| pf009T | 19 | 5555800   | T/A | het | S | 1 | T | AT | Y | Y | Y |
| pf009T | 19 | 9932230   | G/A | het | S | 1 | G | GA | Y | Y | Y |
| pf009T | 19 | 59536671  | G/A | het | S | 1 | G | GA | Y | Y | Y |
| pf009T | 20 | 29428743  | C/A | het | S | 1 | C | CA | Y | Y | Y |
| pf009T | 20 | 29517039  | C/T | het | S | 1 | C | CT | Y | Y | Y |
| pf009T | 20 | 49834591  | G/A | het | S | 1 | G | GA | Y | Y | Y |
| pf009T | 21 | 31517729  | C/T | het | S | 1 | C | CT | Y | Y | Y |
| pf009T | 22 | 20365587  | G/A | het | S | 1 | G | GA | Y | Y | Y |
| pf009T | 22 | 41610413  | G/A | het | S | 1 | G | GA | Y | Y | Y |
| pf010T | 1  | 36069651  | A/G | het | S | 1 | A | AG | Y | Y | Y |
| pf010T | 1  | 66599940  | A/C | het | S | 1 | A | CA | Y | Y | Y |
| pf010T | 1  | 150222306 | T/C | het | S | 1 | T | CT | Y | Y | Y |
| pf010T | 1  | 151903237 | G/T | het | S | 1 | G | GT | Y | Y | Y |
| pf010T | 1  | 167963661 | C/T | het | S | 1 | C | CT | Y | Y | Y |
| pf010T | 1  | 195150384 | G/T | het | S | 1 | G | GT | Y | Y | Y |
| pf010T | 1  | 209600711 | C/G | het | S | 1 | C | CG | Y | Y | Y |
| pf010T | 2  | 69203662  | C/G | het | S | 1 | C | GC | Y | Y | Y |
| pf010T | 2  | 178947007 | A/G | het | S | 1 | A | GA | Y | Y | Y |
| pf010T | 2  | 201185624 | G/A | het | S | 1 | G | GA | Y | Y | Y |
| pf010T | 3  | 161577970 | A/C | het | S | 1 | A | CA | Y | Y | Y |
| pf010T | 4  | 5746959   | T/G | het | S | 1 | T | GT | Y | Y | Y |
| pf010T | 4  | 85969334  | A/T | het | S | 1 | A | AT | Y | Y | Y |
| pf010T | 4  | 140407591 | T/A | het | S | 1 | T | AT | Y | Y | Y |
| pf010T | 5  | 33685474  | C/T | het | S | 1 | C | CT | Y | Y | Y |
| pf010T | 5  | 114576106 | A/C | het | S | 1 | A | CA | Y | Y | Y |
| pf010T | 5  | 170273787 | T/G | het | S | 1 | T | GT | Y | Y | Y |
| pf010T | 5  | 178438486 | G/A | het | S | 1 | G | GA | Y | Y | Y |
| pf010T | 6  | 83867246  | G/A | het | S | 1 | G | GA | Y | Y | Y |
| pf010T | 6  | 147629932 | C/G | het | S | 1 | C | GC | Y | Y | Y |
| pf010T | 6  | 147629940 | G/T | het | S | 1 | G | G  | Y | N | N |
| pf010T | 7  | 20751484  | G/C | het | S | 1 | G | GC | Y | Y | Y |
| pf010T | 7  | 56093883  | T/C | het | S | 1 | T | CT | Y | Y | Y |
| pf010T | 7  | 121731574 | G/T | het | S | 1 | G | GT | Y | Y | Y |
| pf010T | 7  | 128285801 | C/G | het | S | 1 | C | CG | Y | Y | Y |

|         |    |           |     |     |   |   |    |    |   |   |   |
|---------|----|-----------|-----|-----|---|---|----|----|---|---|---|
| pfg010T | 8  | 10503553  | C/A | het | S | 1 | C  | CA | Y | Y | Y |
| pfg010T | 8  | 30820449  | C/T | het | S | 1 | C  | CT | Y | Y | Y |
| pfg010T | 8  | 100513070 | T/C | het | S | 1 | T  | CT | Y | Y | Y |
| pfg010T | 8  | 114255190 | G/C | het | S | 1 | G  | GC | Y | Y | Y |
| pfg010T | 9  | 5223845   | G/A | het | S | 1 | G  | GA | Y | Y | Y |
| pfg010T | 9  | 121115286 | A/T | het | S | 1 | A  | AT | Y | Y | Y |
| pfg010T | 9  | 130808768 | T/C | het | S | 1 | T  | CT | Y | Y | Y |
| pfg010T | 9  | 133375548 | C/T | het | S | 1 | C  | CT | Y | Y | Y |
| pfg010T | 10 | 94659215  | C/T | het | S | 1 | C  | CT | Y | Y | Y |
| pfg010T | 10 | 117030947 | C/G | het | S | 1 | C  | GC | Y | Y | Y |
| pfg010T | 11 | 128345096 | A/G | het | S | 1 | A  | GA | Y | Y | Y |
| pfg010T | 12 | 412651    | A/G | het | S | 1 | A  | GA | Y | Y | Y |
| pfg010T | 12 | 7252512   | C/T | het | S | 1 | C  | CT | Y | Y | Y |
| pfg010T | 12 | 7545147   | A/G | het | S | 1 | A  | AG | Y | Y | Y |
| pfg010T | 12 | 77055139  | G/A | het | S | 1 | G  | GA | Y | Y | Y |
| pfg010T | 12 | 109113197 | T/A | het | S | 1 | T  | TA | Y | Y | Y |
| pfg010T | 14 | 20094918  | A/T | het | S | 1 | A  | AT | Y | Y | Y |
| pfg010T | 14 | 49190481  | T/C | het | S | 1 | T  | CT | Y | Y | Y |
| pfg010T | 15 | 41854167  | C/G | het | S | 1 | C  | CG | Y | Y | Y |
| pfg010T | 15 | 47079383  | C/T | het | S | 1 | C  | CT | Y | Y | Y |
| pfg010T | 15 | 51676732  | G/A | het | S | 1 | G  | GA | Y | Y | Y |
| pfg010T | 16 | 55089204  | T/C | het | S | 1 | T  | CT | Y | Y | Y |
| pfg010T | 16 | 63542280  | G/A | het | S | 1 | G  | GA | Y | Y | Y |
| pfg010T | 16 | 82828210  | G/A | het | S | 1 | GA | GA | N | Y | N |
| pfg010T | 17 | 31967780  | C/G | het | S | 1 | C  | CG | Y | Y | Y |
| pfg010T | 18 | 7013155   | G/A | het | S | 1 | G  | GA | Y | Y | Y |
| pfg010T | 18 | 39108265  | A/T | het | S | 1 | A  | AT | Y | Y | Y |
| pfg010T | 18 | 45817276  | C/T | het | S | 1 | C  | TC | Y | Y | Y |
| pfg010T | 20 | 9508913   | G/C | het | S | 1 | G  | CG | Y | Y | Y |
| pfg010T | 21 | 21578496  | A/G | het | S | 1 | A  | AG | Y | Y | Y |
| pfg011T | 1  | 16134611  | G/A | het | S | 1 | G  | GA | Y | Y | Y |
| pfg011T | 1  | 31921918  | C/T | het | S | 1 | C  | CT | Y | Y | Y |
| pfg011T | 1  | 32518365  | G/T | het | S | 1 | G  | GT | Y | Y | Y |
| pfg011T | 1  | 79156167  | T/G | het | S | 1 | T  | T  | Y | N | N |
| pfg011T | 1  | 86678530  | A/C | het | S | 1 | A  | CA | Y | Y | Y |
| pfg011T | 1  | 90952700  | A/C | het | S | 1 | A  | CA | Y | Y | Y |
| pfg011T | 1  | 148502352 | A/T | het | S | 1 | A  | TA | Y | Y | Y |
| pfg011T | 1  | 149188269 | A/G | het | S | 1 | A  | AG | Y | Y | Y |
| pfg011T | 1  | 150999908 | G/A | het | S | 1 | G  | AG | Y | Y | Y |
| pfg011T | 1  | 156899166 | T/G | het | S | 1 | T  | GT | Y | Y | Y |
| pfg011T | 1  | 158366583 | G/A | het | S | 1 | G  | GA | Y | Y | Y |
| pfg011T | 1  | 212623501 | C/T | het | S | 1 | C  | TC | Y | Y | Y |
| pfg011T | 1  | 246045343 | A/G | het | S | 1 | A  | GA | Y | Y | Y |
| pfg011T | 2  | 71679300  | G/A | het | S | 1 | G  | AG | Y | Y | Y |
| pfg011T | 2  | 160405585 | C/T | het | S | 1 | C  | TC | Y | Y | Y |
| pfg011T | 2  | 169721102 | T/G | het | S | 1 | T  | GT | Y | Y | Y |
| pfg011T | 2  | 171395867 | T/A | het | S | 1 | T  | AT | Y | Y | Y |
| pfg011T | 2  | 189570320 | A/C | het | S | 1 | A  | CA | Y | Y | Y |
| pfg011T | 3  | 45852127  | C/G | het | S | 1 | C  | GC | Y | Y | Y |
| pfg011T | 3  | 64507473  | C/T | het | S | 1 | C  | CT | Y | Y | Y |
| pfg011T | 3  | 174177488 | T/G | het | S | 1 | T  | GT | Y | Y | Y |
| pfg011T | 4  | 100747028 | T/G | het | S | 1 | T  | GT | Y | Y | Y |
| pfg011T | 4  | 114498425 | G/A | het | S | 1 | G  | GA | Y | Y | Y |
| pfg011T | 4  | 118225130 | T/G | het | S | 1 | T  | TG | Y | Y | Y |
| pfg011T | 4  | 122177623 | T/G | het | S | 1 | T  | GT | Y | Y | Y |
| pfg011T | 4  | 126556216 | T/G | het | S | 1 | T  | GT | Y | Y | Y |
| pfg011T | 4  | 130083599 | A/G | het | S | 1 | A  | GA | Y | Y | Y |
| pfg011T | 5  | 102337985 | T/A | het | S | 1 | T  | AT | Y | Y | Y |
| pfg011T | 5  | 126806646 | A/C | het | S | 1 | A  | CA | Y | Y | Y |
| pfg011T | 5  | 147758836 | T/C | het | S | 1 | T  | CT | Y | Y | Y |
| pfg011T | 6  | 7515684   | C/T | het | S | 1 | C  | TC | Y | Y | Y |
| pfg011T | 6  | 47757318  | T/G | het | S | 1 | T  | GT | Y | Y | Y |
| pfg011T | 7  | 37746610  | C/T | het | S | 1 | C  | CT | Y | Y | Y |
| pfg011T | 7  | 43499235  | T/C | het | S | 1 | T  | TC | Y | Y | Y |
| pfg011T | 8  | 32737373  | T/G | het | S | 1 | T  | GT | Y | Y | Y |
| pfg011T | 8  | 97866687  | A/C | het | S | 1 | A  | CA | Y | Y | Y |
| pfg011T | 8  | 107760626 | A/G | het | S | 1 | A  | AG | Y | Y | Y |
| pfg011T | 8  | 107851480 | C/A | het | S | 1 | C  | CA | Y | Y | Y |
| pfg011T | 9  | 23691404  | G/A | het | S | 1 | G  | GA | Y | Y | Y |
| pfg011T | 9  | 108729663 | C/T | het | S | 1 | C  | CT | Y | Y | Y |
| pfg011T | 9  | 124695083 | T/C | het | S | 1 | T  | CT | Y | Y | Y |
| pfg011T | 9  | 129576483 | C/T | het | S | 1 | C  | TC | Y | Y | Y |
| pfg011T | 10 | 123836530 | T/G | het | S | 1 | T  | GT | Y | Y | Y |
| pfg011T | 11 | 55491795  | A/C | het | S | 1 | A  | CA | Y | Y | Y |
| pfg011T | 11 | 82861472  | A/G | het | S | 1 | A  | GA | Y | Y | Y |
| pfg011T | 11 | 116543430 | G/A | het | S | 1 | G  | AG | Y | Y | Y |
| pfg011T | 11 | 129844395 | C/G | het | S | 1 | C  | CG | Y | Y | Y |
| pfg011T | 12 | 1760422   | A/G | het | S | 1 | A  | GA | Y | Y | Y |
| pfg011T | 12 | 4892179   | A/G | het | S | 1 | A  | A  | Y | N | N |
| pfg011T | 12 | 106569597 | A/C | het | S | 1 | A  | CA | Y | Y | Y |
| pfg011T | 13 | 66699756  | T/G | het | S | 1 | T  | GT | Y | Y | Y |
| pfg011T | 13 | 66700441  | T/G | het | S | 1 | T  | GT | Y | Y | Y |

|         |    |           |     |     |   |   |   |    |   |   |   |
|---------|----|-----------|-----|-----|---|---|---|----|---|---|---|
| pfg011T | 13 | 76493903  | G/A | het | S | 1 | G | AG | Y | Y | Y |
| pfg011T | 14 | 41426564  | C/G | het | S | 1 | C | CG | Y | Y | Y |
| pfg011T | 14 | 44044924  | T/G | het | S | 1 | T | GT | Y | Y | Y |
| pfg011T | 14 | 51264476  | A/C | het | S | 1 | A | CA | Y | Y | Y |
| pfg011T | 15 | 23522228  | G/T | het | S | 1 | G | GT | Y | Y | Y |
| pfg011T | 15 | 40854866  | A/C | het | S | 1 | A | CA | Y | Y | Y |
| pfg011T | 15 | 72490964  | G/A | het | S | 1 | G | AG | Y | Y | Y |
| pfg011T | 16 | 12706014  | C/T | het | S | 1 | C | CT | Y | Y | Y |
| pfg011T | 16 | 20988359  | G/A | het | S | 1 | G | GA | Y | Y | Y |
| pfg011T | 16 | 24280346  | A/C | het | S | 1 | A | CA | Y | Y | Y |
| pfg011T | 17 | 39693642  | G/A | het | S | 1 | G | GA | Y | Y | Y |
| pfg011T | 17 | 45154921  | C/T | het | S | 1 | C | CT | Y | Y | Y |
| pfg011T | 17 | 64425148  | G/A | het | S | 1 | G | GA | Y | Y | Y |
| pfg011T | 17 | 71516038  | C/G | het | S | 1 | C | CG | Y | Y | Y |
| pfg011T | 18 | 336549    | C/T | het | S | 1 | C | CT | Y | Y | Y |
| pfg011T | 18 | 53294791  | G/A | het | S | 1 | G | GA | Y | Y | Y |
| pfg011T | 19 | 35732082  | T/G | het | S | 1 | T | GT | Y | Y | Y |
| pfg011T | 20 | 20116675  | G/A | het | S | 1 | G | GA | Y | Y | Y |
| pfg011T | 20 | 57002668  | G/A | het | S | 1 | G | GA | Y | Y | Y |
| pfg011T | 20 | 59263293  | T/G | het | S | 1 | T | GT | Y | Y | Y |
| pfg011T | 21 | 32277741  | A/T | het | S | 1 | A | AT | Y | Y | Y |
| pfg011T | 22 | 45031788  | C/T | het | S | 1 | C | CT | Y | Y | Y |
| pfg011T | 22 | 45238870  | C/T | het | S | 1 | C | CT | Y | Y | Y |
| pfg011T | X  | 71276472  | G/A | het | S | 1 | G | GA | Y | Y | Y |
| pfg011T | X  | 152786702 | G/A | het | S | 1 | G | AG | Y | Y | Y |

**Supplementary Table 5 Comparison of somatic point mutation spectra across different subtypes of gastric cancers**

| Base pair change | MSI |        | MSS |        |
|------------------|-----|--------|-----|--------|
|                  | %   | number | %   | number |
| T>G/A>C          | 4%  | 121    | 8%  | 142    |
| T>C/A>G          | 30% | 876    | 13% | 220    |
| T>A/A>T          | 4%  | 108    | 8%  | 137    |
| C>T/G>A*         | 53% | 1562   | 48% | 831    |
| C>G/G>C          | 1%  | 31     | 9%  | 150    |
| C>A/G>T          | 9%  | 271    | 15% | 261    |

\*68% of T>C/A>G mutation occur in CpG dinucleotide setting

**Supplementary Table 8 Core signaling pathways and processes frequently altered in gastric cancers.** Pathways altered in more than one-third of gastric cancers and involving biological processes highly relevant to carcinogenesis are shown and arranged according to most statistically significant enrichment (See Supplementary Table 9 for the complete list and statistics)

| Core cancer process                         | Number of genes mutated | % tumors with mutation | Representative mutated genes                                                                                                                                                                                                                                                                      |
|---------------------------------------------|-------------------------|------------------------|---------------------------------------------------------------------------------------------------------------------------------------------------------------------------------------------------------------------------------------------------------------------------------------------------|
| Chromatin modification*                     | 20 (46)                 | 50% (59%)              | ARID1A,CARM1,CREBBP,H1FNT,HDAC6,MAP3K12,MYST1,MYST3,MYST4,NA P1L4,NSD1,PBRM1,PPARGC1A,RPS6KA5,RSF1,SIRT1,SMARCC1,SYCP3,TLK2, WHSC1L1 (ARID1B,ASH1L,AURKB,BPTF,BRD8,CBX6,CHD1,CHD3,CHD4,DNMT1,DNMT3 B,EHMT1,EP400,EZH1,INO80,KAT5,MBD2,MLL,MLL5,MORF4L1,PRDM2,SETD 2,SETDB1,SMARCA1,SRCAP,UBE2E1)* |
| Cell junction organization                  | 21                      | 59%                    | CADM3,CDH1,CDH11,CDH12,CDH18,CDH2,CDH24,CDH4,CDH7,CTNNA1,CTN NB1,DST,FLNC,INADL,ITGB4,LAMA3,PARD3,PARD6B,PRKCI,TESK1                                                                                                                                                                              |
| ALK pathway (WNT/BMP/TGFB)                  | 12                      | 55%                    | APC,ATF2,BMP4,BMPR1A,BMPR2,CHRD,CTNNB1,MAP3K7,SMAD4,TGFB1,TG FB3,TGFB3                                                                                                                                                                                                                            |
| Axon guidance <sup>#</sup>                  | 32                      | 59%                    | CACNB2,COL6A3,DPYSL5,ERBB2,MYH11,ROCK1,ROCK2,SEMA3E,SEMA6D,S EMA7A,SOS2,SPTA1                                                                                                                                                                                                                     |
| BMP signaling                               | 9                       | 36%                    | ACVR2A,ACVR2B,BMPR1A,BMPR2,CER1,CHRD1,FSTL1,GREM2,SMAD4                                                                                                                                                                                                                                           |
| TGFB pathway                                | 8                       | 41%                    | APC,CDH1,CREBBP,MAP2K1,MAP3K7,SMAD4,TGFB1,TGFB3                                                                                                                                                                                                                                                   |
| MAPK signaling                              | 44                      | 82%                    | ATF2,CACNA2D2,CACNB2,CACNG3,EGF,FGF23,FGF5,FLNB,FLNC,HSPA6,IL1 R1,KRAS,MAP2K1,MAP3K1,MAP3K12,MAP3K3,MAP3K7,MAP4K1,MAP4K3,M APK10,MAPK14,MAPK8IP3,MECOM,MOS,NFKB1,NGF,NRAS,NTF3,PDGFRB,P LA2G12B,PPP3CA,PRKCA,PTPN5,PTPRR,RAPGEF2,RASA2,RELA,RPS6KA3,RP S6KA5,SOS2,TAOK2,TGFB1,TGFB3,TP53          |
| DNA replication                             | 21                      | 41%                    | ACHE,CDC6,EGF,EXO1,GLI1,GTPBP4,KCTD13,KIN,MCM3,MCM3AP,MCM7,M RE11A,MSH3,MSH6,MUTYH,NAE1,NUP98,ORC4L,RAD17,REV3L,TP73                                                                                                                                                                              |
| Focal adhesion <sup>#</sup>                 | 36                      | 64%                    | COL11A1,COL5A3,COL6A3,CTNNB1,ERBB2,FLNB,FLNC,ITGA2,LAMA1,LAMA 2,LAMA3,PTEN,ROCK1,ROCK2,SOS2,TNR                                                                                                                                                                                                   |
| ERBB signaling                              | 19                      | 45%                    | ABL2,EGF,ERBB2,ERBB3,ERBB4,KRAS,MAP2K1,MAPK10,NRAS,NRG1,NRG3, PAK6,PAK7,PIK3R3,PLCG1,PRKCA,PTK2,SHC4,SOS2                                                                                                                                                                                         |
| Cell cycle regulation <sup>#</sup>          | 50                      | 77%                    | APC,BRCA2,FANCG,MRE11A,PLK1,PTEN,SMC4,TP53,TTK,ZBTB17                                                                                                                                                                                                                                             |
| ATR/BRCA pathway                            | 7                       | 64%                    | ATM,BRCA1,BRCA2,FANCG,MRE11A,RAD17,TP53                                                                                                                                                                                                                                                           |
| RB signaling                                | 5                       | 50%                    | ATM,MAPK14,MYT1,TP53,WEE1                                                                                                                                                                                                                                                                         |
| Fas signaling                               | 13                      | 55%                    | ALG2,CAD,DEDD,FADD,MAP3K1,MAPK10,MAPK8IP3,MET,NFKB1,NFKBIE,R OCK1,TP53,TUFM                                                                                                                                                                                                                       |
| Rho GTPase cycle <sup>#</sup>               | 22                      | 36%                    | ARAP2,ARHGAP20,ARHGAP22,ARHGAP28,FAM13B,MYO9A,SOS2,TIAM1                                                                                                                                                                                                                                          |
| Ubiquitin mediated proteolysis <sup>#</sup> | 24                      | 46%                    | BRCA1,HERC2,TRIP12,UBE3C,UBR5                                                                                                                                                                                                                                                                     |

\* Number, % and Genes in bracket are calculated with inclusion of manually curated chromatin modification genes not included in the GO biological process pathway list (see Supplementary Table 10)

<sup>#</sup> Only genes mutated in 2 or more samples are shown in these pathways because of the large number, see Supplementary table 9 for detail list

**Supplementary Table 11 Summary of clinico-pathological data of 109 gastric cancer patients sequenced for ARID1A**

| <b>Variable</b>                                                             | <b>Number</b> |
|-----------------------------------------------------------------------------|---------------|
| <b>Sex</b>                                                                  |               |
| M                                                                           | 72            |
| F                                                                           | 37            |
| <b>Age</b>                                                                  |               |
| mean=68.8 (range 23-88)                                                     |               |
| <b>Lauren's tumor type</b>                                                  |               |
| Intestinal                                                                  | 86            |
| Diffuse                                                                     | 12            |
| Mixed                                                                       | 10            |
| Indeterminate                                                               | 1             |
| <b>Tumor differentiation</b>                                                |               |
| Well/moderate                                                               | 48            |
| Poor                                                                        | 61            |
| <b>Tumor site</b>                                                           |               |
| Cardia                                                                      | 35            |
| Body                                                                        | 26            |
| Antrum                                                                      | 46            |
| Diffuse                                                                     | 2             |
| <b>Tumor stage (UICC 2002)</b>                                              |               |
| Stage I                                                                     | 15            |
| Stage II                                                                    | 21            |
| Stage III                                                                   | 35            |
| Stage IV                                                                    | 38            |
| <b>EBV status</b>                                                           |               |
| Present                                                                     | 15            |
| Absent                                                                      | 94            |
| <b>MSI status</b>                                                           |               |
| MSI                                                                         | 23            |
| MSS                                                                         | 86            |
| <b>Helicobacter pylori infection</b>                                        |               |
| Present                                                                     | 56            |
| Absent                                                                      | 53            |
| <b>Operation type</b>                                                       |               |
| Curative resection                                                          | 62            |
| Palliative resection                                                        | 47            |
| <b>Recurrence status for patients who have undergone curative resection</b> |               |
| Recur                                                                       | 27            |
| No recurrence                                                               | 35            |
| Median follow-up period for patients with no recurrence = 89 months         |               |
| Median time to recurrence = 14 months                                       |               |
| <b>Follow up status</b>                                                     |               |
| Alive or censored                                                           | 41            |
| Died of disease                                                             | 68            |
| Median follow-up period for patients alive = 89 months                      |               |
| Median time to death = 14 months                                            |               |

**Supplementary Table 12 Summary of relationship of ARID1A mutation with protein expression and molecular subtypes of gastric cancer.** Results are derived from Sanger sequencing of ARID1A and TP53 in 109 GCs. There is no significant association of ARID1A alteration with sex, age, tumor location, Lauren's tumor type, differentiation, Helicobacter pylori infection, and stage.

|                              | Total no. | No. with ARID1A mutation (%) | No. with reduced ARID1A protein level (%) <sup>a</sup> | Total no. with ARID1A alteration (mutation and/or reduced protein) (%) | p-value ( $\chi^2$ test) <sup>b</sup> |
|------------------------------|-----------|------------------------------|--------------------------------------------------------|------------------------------------------------------------------------|---------------------------------------|
| <b>Molecular subtype</b>     |           |                              |                                                        |                                                                        |                                       |
| MSI                          | 23        | 18 (78%)                     | 15 (65%)                                               | 19 (83%)                                                               | <0.001 <sup>c</sup>                   |
| MSS EBV                      | 15        | 7 (47%)                      | 10 (67%)                                               | 11 (73%)                                                               | 0.002 <sup>d</sup>                    |
| MSS non-EBV                  | 71        | 7 (10%)                      | 5 (7%)                                                 | 8 (11%)                                                                |                                       |
| <b>TP53 mutation</b>         |           |                              |                                                        |                                                                        |                                       |
| mutated                      | 45        | 7 (16%)                      | 5 (11%)                                                | 8 (18%)                                                                | 0.008 <sup>e</sup>                    |
| wildtype                     | 64        | 25 (39%)                     | 25 (39%)                                               | 30 (47%)                                                               |                                       |
| <b>ARID1A immunostaining</b> |           |                              |                                                        |                                                                        |                                       |
| normal                       | 79        | 8 (10%)                      |                                                        |                                                                        | <0.001                                |
| weak                         | 8         | 7 (88%)                      |                                                        |                                                                        |                                       |
| loss                         | 22        | 17 (77%)                     |                                                        |                                                                        |                                       |

<sup>a</sup> Reduced protein level corresponds to either loss or weak expression.

<sup>b</sup> p-values of ARID1A mutation in relation to various molecular parameters are shown. Similar significance levels are observed for ARID1A protein or combined mutation and/or protein alterations.

<sup>c</sup> compared with MSS non-EBV.

<sup>d</sup> compared with MSS non-EBV (Fisher exact test).

<sup>e</sup> p=0.002 for ARID1A alteration in relation to TP53 mutation.

**Supplementary Table 14 Univariate and multivariate cox regression analysis of variables related to recurrence-free survival in 62 gastric cancer patients undergoing curative resection and analyzed for ARID1A alteration**

| Variable                         | Univariate analysis |      |            |        | Multivariate analysis |             |            |       |
|----------------------------------|---------------------|------|------------|--------|-----------------------|-------------|------------|-------|
|                                  | n                   | HR   | 95% CI     | p      | n                     | adjusted HR | 95% CI     | p     |
| <b>Stage</b>                     |                     |      |            |        |                       |             |            |       |
| I                                | 15                  | 1    |            |        |                       | 1           |            |       |
| II                               | 18                  | 0.55 | 0.09-3.31  | 0.517  |                       | 0.59        | 0.1-3.55   | 0.567 |
| III                              | 19                  | 8.86 | 2.54-30.93 | 0.001  |                       | 9.25        | 2.62-32.62 | 0.001 |
| IV                               | 10                  | 8.63 | 2.13-35.00 | 0.003  |                       | 13.8        | 3.15-60.50 | 0.001 |
| <b>ARID1A alteration</b>         |                     |      |            |        |                       |             |            |       |
| Mutated or reduced protein level | 22                  | 1    |            |        | 22                    | 1           |            |       |
| No alteration                    | 40                  | 2.35 | 0.94-5.84  | 0.067  | 40                    | 3.09        | 1.13-8.50  | 0.029 |
| <b>MSI status</b>                |                     |      |            |        |                       |             |            |       |
| MSI                              | 16                  | 1    |            |        |                       |             |            |       |
| MSS                              | 46                  | 3.46 | 1.04-11.52 | 0.043  |                       |             |            |       |
| <b>Lauren's tumor type</b>       |                     |      |            |        |                       |             |            |       |
| Intestinal/mixed/indeterminate   | 52                  | 1    |            |        |                       |             |            |       |
| diffuse                          | 10                  | 4.85 | 2.06-11.40 | <0.001 |                       |             |            |       |



**Supplementary Table 15 Comparison of somatic indel mutation rate of mononucleotide repeats in ARID1A gene versus background mutation rate in MSI gastric cancers**

| Type of Mononucleotide repeat | Number of specific repeat in coding region of ARID1A | ARID1A mutation rate                                                 |                                                                                  |                                                                     | Background mutation rate                                                                                                   |                                                                                                 |                                                                                        | Fold change of indel mutation rate (ARID1A coding repeats/global coding repeats) | p-value (chi-square test) |
|-------------------------------|------------------------------------------------------|----------------------------------------------------------------------|----------------------------------------------------------------------------------|---------------------------------------------------------------------|----------------------------------------------------------------------------------------------------------------------------|-------------------------------------------------------------------------------------------------|----------------------------------------------------------------------------------------|----------------------------------------------------------------------------------|---------------------------|
|                               |                                                      | Total no of specific repeat in coding region of ARID1A in 23 MSI GCs | No of indel mutation in specific repeat in coding region of ARID1A in 23 MSI GCs | Indel mutation rate of specific repeat in ARID1A for 23 MSI GCs (%) | Total no of specific repeat in coding region of all genes adequately covered by exome sequencing in 4 MSI GCs <sup>a</sup> | No of indel mutation in specific repeat in coding region of all genes in 4 MSI GCs <sup>b</sup> | Indel mutation rate of specific repeat in coding region of all genes for 4 MSI GCs (%) |                                                                                  |                           |
| G7                            | 1                                                    | 23                                                                   | 6 <sup>c</sup>                                                                   | 26.087%                                                             | 1520                                                                                                                       | 20                                                                                              | 1.316%                                                                                 | 20                                                                               | 0.000000                  |
| G6                            | 5                                                    | 115                                                                  | 2                                                                                | 1.739%                                                              | 12170                                                                                                                      | 18                                                                                              | 0.148%                                                                                 | 12                                                                               | 0.000025                  |
| G5                            | 9                                                    | 207                                                                  | 0                                                                                | 0.000%                                                              | 65488                                                                                                                      | 16                                                                                              | 0.024%                                                                                 | 0                                                                                | NS                        |
| G4                            | 23                                                   | 529                                                                  | 0                                                                                | 0.000%                                                              | 245287                                                                                                                     | 5                                                                                               | 0.002%                                                                                 | 0                                                                                | NS                        |
| C6                            | 9                                                    | 207                                                                  | 7                                                                                | 3.382%                                                              | 13721                                                                                                                      | 28                                                                                              | 0.204%                                                                                 | 17                                                                               | 0.000000                  |
| C5                            | 17                                                   | 391                                                                  | 7                                                                                | 1.790%                                                              | 68308                                                                                                                      | 20                                                                                              | 0.029%                                                                                 | 61                                                                               | 0.000000                  |
| C4                            | 52                                                   | 1196                                                                 | 1                                                                                | 0.084%                                                              | 257183                                                                                                                     | 9                                                                                               | 0.003%                                                                                 | 24                                                                               | 0.000009                  |
| A6                            | 1                                                    | 23                                                                   | 0                                                                                | 0.000%                                                              | 22514                                                                                                                      | 46                                                                                              | 0.204%                                                                                 | 0                                                                                | NS                        |
| A5                            | 2                                                    | 46                                                                   | 0                                                                                | 0.000%                                                              | 86007                                                                                                                      | 33                                                                                              | 0.038%                                                                                 | 0                                                                                | NS                        |
| A4                            | 8                                                    | 184                                                                  | 0                                                                                | 0.000%                                                              | 286739                                                                                                                     | 19                                                                                              | 0.007%                                                                                 | 0                                                                                | NS                        |
| T5                            | 1                                                    | 23                                                                   | 0                                                                                | 0.000%                                                              | 85092                                                                                                                      | 18                                                                                              | 0.021%                                                                                 | 0                                                                                | NS                        |
| T4                            | 3                                                    | 69                                                                   | 0                                                                                | 0.000%                                                              | 287378                                                                                                                     | 15                                                                                              | 0.005%                                                                                 | 0                                                                                | NS                        |

<sup>a</sup>counting all mononucleotide repeats in coding region of the 16,586 genes targeted by the SureSelect All Exon kit and with adequate sequence coverage ( $\geq 10X$  in tumor and paired normal) in 4 MSI gastric cancers

<sup>b</sup>Counting total number of indels involving these specific repeat sequences in coding regions as specified in column F

<sup>c</sup>One of the MSI GC (sample SX186) has two indels (one insertion and one deletion) involving the same G7 repeat and were counted as one in the statistical analysis

**Supplementary Table 16 Primers used for Sanger sequencing of ARID1A and TP53**

| Gene Name | Genome_Region          | Primer Name (forward) | Sequence                 | Primer Name (reverse) | Sequence                | Coding Exon number |
|-----------|------------------------|-----------------------|--------------------------|-----------------------|-------------------------|--------------------|
| ARID1A    | Chr1:26895428-26896189 | Ex01F0*               | GGGGAGAAGACGAAGACAGG     | Ex01R2                | ACCTCTCGGGGAGCTCAG      | 1                  |
| ARID1A    | Chr1:26896075-26896759 | Ex01F3                | CAGCAGAACTCTCACGACCA     | Ex01R3                | GAGAAGAGCCAGACAATGGC    | 1                  |
| ARID1A    | Chr1:26928590-26929031 | Ex02F                 | AGGTTGGTCTCATTGCTCTTTC   | Ex02R                 | TTGGAAGCCAAGGATACATTC   | 2                  |
| ARID1A    | Chr1:26930094-26930785 | Ex03F1                | ACCCTGGGCCTCCTAAGTATG    | Ex03R2                | TGCACGTTAGAGAACCACTCTG  | 3                  |
| ARID1A    | Chr1:26931669-26932043 | Ex04F                 | CAGTCCCATAACCCTTTCACAG   | Ex04R                 | CTGGGCAGGGAGACAGAAC     | 4                  |
| ARID1A    | Chr1:26959808-26960291 | Ex05F                 | AAAGAACGTGTGTGATGTATTTGC | Ex05R                 | GAAACTATGCAGGCATGAGCC   | 5                  |
| ARID1A    | Chr1:26960325-26960643 | Ex06F                 | TTGGCTGGATCTCTTTGTGTG    | Ex06R                 | TTCATGGTCAAACAGCTCTCC   | 6                  |
| ARID1A    | Chr1:26961155-26961503 | Ex07F                 | TCCCAGGATAAGGATGGAGAG    | Ex07R                 | GGACAGCCCTTCTCTCACAAG   | 7                  |
| ARID1A    | Chr1:26961960-26962445 | Ex08F                 | TTGAATGACATTGTTTGGTGTTT  | Ex08R                 | GGTCCAGAAGCATCTCAATAATC | 8                  |
| ARID1A    | Chr1:26965217-26965737 | Ex09F                 | CACAGCACTATTTGGCTCCAG    | Ex10R                 | GGCTGGGATCTTGTCACTCTC   | 9,10               |
| ARID1A    | Chr1:26966793-26967161 | Ex11F                 | CAAGAGACTTCTGAGACCCTTAGC | Ex11R                 | CATGGTACCACATGAAGCCAG   | 11                 |
| ARID1A    | Chr1:26970107-26970509 | Ex12F                 | GAATACCTTACAGCCTGATGGG   | Ex12R                 | ATCCTTGGCATATCCTGTTGG   | 12                 |
| ARID1A    | Chr1:26971469-26972155 | Ex13F                 | GGCCTTAGGAAGAACTTTCCC    | Ex14R                 | CAAGAACCCTGAGCCATTCTC   | 13,14              |
| ARID1A    | Chr1:26972337-26973137 | Ex15F                 | GAACTCTGAAGAGGGCCTGG     | Ex17R                 | ATTGAGGACGTGGCTCTTCAG   | 15,16,17           |
| ARID1A    | Chr1:26973227-26974866 | Ex18F1                | GGAAGAAAGAGTGGTGGTTGC    | Ex19R                 | TGGCTAAAGATGAGACATTCCC  | 18,19              |
| ARID1A    | Chr1:26977966-26978947 | Ex20F1                | GGAGAACCTTTGGGAAAGGAG    | Ex20R2                | GGCTTCGAATGGTATTGGACA   | 20                 |
| ARID1A    | Chr1:26978755-26979672 | Ex20F3                | GCTAAGAGTTCAGAGGCCATCA   | Ex20R4                | CCGCATCATGTCCACACTA     | 20                 |
| ARID1A    | Chr1:26979439-26981359 | Ex20F5                | CTCAGTGACCGAAAGAACCC     | Ex20R5                | GAGGTGGAAGGAGGAGAGAGA   | 20                 |
| TP53      | Chr17:7518795-7519311  | TP53_5F               | CTTTCAACTCTGTCTCCTTCCTC  | TP53_6R_new           | GGGAGGTCAAATAAGCAGCA    | 5,6                |
| TP53      | Chr17:7517448-7518362  | TP53_7F               | CCTCATCTTGGGCCTGTGTT     | TP53_9R_new           | TGTCTTTGAGGCATCACTGC    | 7,8,9              |

\*all primers for ARID1A were according to a previous study (Jones, S. et al. Science 330, 228-31 (2010)) except the one labeled with "asterisk" which was newly designed.

ARID1A: Ensembl Gene ID ENSG00000117713, Ensembl transcript ID ENST00000324856

TP53: Ensembl Gene ID ENSG00000141510, Ensembl transcript ID ENST00000269305

**Supplementary Table 17 Background mutation rate estimates for somatic SNVs and somatic indels in the studied gastric cancer cohort.** Background mutation rates were separately estimated in microsatellite unstable gastric tumors (MSI) and microsatellite stable gastric tumors (MSS) for both somatic SNVs and somatic indels. For somatic SNVs, background mutation rates are calculated for different nucleotide bases.

|     | Somatic SNVs |          |          |          | Somatic indels |
|-----|--------------|----------|----------|----------|----------------|
|     | A            | C        | G        | T        |                |
| MSI | 1.48E-05     | 2.38E-05 | 3.91E-05 | 1.41E-05 | 3.78E-05       |
| MSS | 9.66E-07     | 3.68E-06 | 4.74E-06 | 1.04E-06 | 3.24E-07       |

## Supplementary Note

Algorithms for exome-sequencing data analysis, somatic mutation callers, mutation annotation and functional impact prediction, driver gene prediction and pathway analysis

### Contents

|                                                                 |    |
|-----------------------------------------------------------------|----|
| Primary sequence analysis.....                                  | 29 |
| Identification of somatic SNVs and somatic indels.....          | 29 |
| Algorithm for somatic SNV identification .....                  | 29 |
| Somatic SNV validation .....                                    | 30 |
| Algorithm for somatic indel identification.....                 | 31 |
| Somatic indel validation.....                                   | 32 |
| Mutation annotation and functional impact prediction.....       | 32 |
| Driver gene prediction .....                                    | 33 |
| Estimating the background mutation rate for somatic SNVs .....  | 33 |
| Estimating the background mutation rate for somatic indels..... | 34 |
| Calculating driver gene score.....                              | 36 |
| Pathway analysis.....                                           | 37 |
| Reference .....                                                 | 37 |

## Primary sequence analysis

Alignment of sequencing reads to the human reference genome (hg18, NCBI36) was done using Illumina's Eland-v2 short read aligner. Single nucleotide variants (SNVs) were called using Samtools<sup>1</sup>. SNV calls from the MAQ caller<sup>2</sup> were further filtered using the Samtools "varFilter" to retain only those with a Phred-scale SNP quality  $\geq 40$ , root mean square mapping quality  $\geq 25$  and read depth  $\geq 3X$ . In addition, SNVs within  $\pm 10\text{bp}$  of an indel are filtered out if the indel has a score  $\geq 25$ ; and in case of more than 2 SNVs called within a 10bp window, all of them were removed. Small insertions and deletions (indels) were predicted using CASAVA's GROUPEr indel caller<sup>3</sup> with default parameter settings except that the "indelsCovCutoff" is set to -1 to disable the local coverage filter, which is recommended for targeted re-sequencing.

## Identification of somatic SNVs and somatic indels

We developed a new procedure for calling somatic SNVs and somatic indels from short read sequencing data, called SMART (Somatic Mutation Assessment Research Tools).

### Algorithm for somatic SNV identification

For identification of somatic SNVs, SMART takes as inputs the two sets of SNVs called by Samtools in pileup format<sup>1</sup> in tumor and its matched normal sample. It then subtracts the set of SNVs called in the normal sample from those called in the corresponding tumor. The remaining candidates are subsequently filtered out with the following criteria:

1. The Phred scale SNP quality score in tumor must be  $\geq 45$
2. The position must be covered by at least 10 reads in the matched normal data
3. The root-mean-square mapping quality of the reads covering the position in matched normal data must be  $\geq 25$
4. Predicted mutant allele with minimal base quality of Q20 can present in at most 5% of total reads in the matched normal sample
5. Validated SNPs in dbSNP130 were removed

In addition to controlling the observed mutant allele frequency in the match normal sample, we also required that the mutant allele cannot appear in more than 5% of reads in the normal data of at least 95% of all patients in our discovery cohort. Our study has shown that this helps to further reduce potential false positive somatic calls due to the undercalling of germline variants in the matched normal sample, especially at positions with relatively low coverage.

Criteria (1) and (4) control, respectively, the stringency of SNV calling in tumor and how lenient the presence of tumor allele is tolerated in matched normal data. Their values were selected to achieve optimal performance, in terms of both sensitivity and specificity, on the 10 tumor and matched normal pairs from the first phase of our study. The value for the parameter in (1) was assessed by 34 known somatic SNVs in a subset of the 10 patients by Sanger sequencing characterized in a previous study<sup>4</sup>. On the other hand, we assess the parameter value in (4) using false discovery rate (FDR) computed from replicate sample experiments. More specifically, we have generated data on two technical replicate sample pairs, one pair for a gastric tumor and another for the normal gastric sample from the same patient. Both replicate pairs started from the same DNA extract but underwent independent library preparation and sequencing. SMART was then applied to both replicate pairs treating one sample in the pair as “tumor” and the other as “matched normal”, thus any “somatic” call made on such replicate pair should be considered false discovery. FDR was then computed as the average number of false discoveries divided by the average number of discoveries made on real tumor and matched normal comparisons. (Note that there are four possible combinations of real tumor and matched normal pairs.) The optimal parameter combination was then determined based on a 2-dimensional grid search. The final parameter set achieved a sensitivity of 85.3% at  $FDR \leq 5\%$  in this training process.

### **Somatic SNV validation**

SMART predicted a total of 1,848 somatic SNVs among the 10 tumor and matched normal pairs sequenced in the first phase. We performed independent Sequenom MassARRAY genotyping assays on a subset of 472 predicted somatic SNVs in protein coding regions (after removing the known ones

used in the training process and those that failed primer/assay design) (Supplementary Table 3). Each position was assayed in both tumor and matched normal samples from the original patient. 457 (96.8%) of the 472 positions were confirmed as somatic. Of the 15 that failed, 13 were due to false positive SNV calls made in tumor samples and 2 were due to false negative detection of the mutant allele in the matched normal samples (Supplementary Table 3). We removed these 15 invalidated somatic SNVs from our final results. Although we have confirmed only a subset of predicted somatic SNVs from the first 10 cases, the high confirmation rate demonstrated here indicates that the vast majority of the unconfirmed somatic SNVs in our final results on all 22 cases are likely to be true.

### Algorithm for somatic indel identification

SMART uses a similar process for calling somatic indels. The indel calls from tumors and their matched normal sample come from the GROUPER indel caller in CASAVA<sup>3</sup>. Due to ambiguity of indel mapping<sup>5</sup>, subtraction of indels called in matched normal data from those in tumors is done requiring no overlap between the called indel position  $\pm 5\text{bp}$  on both sides<sup>6</sup>. Remaining candidates are subsequently filtered by the following steps:

1. Average depth of coverage in matched normal data for the indel  $\pm 5\text{bp}$  window must be at least 10X
2. All positions in the indel  $\pm 5\text{bp}$  window must be covered
3. Number of reads supporting the indel in tumor must be  $\geq 10$
4. The total number of gaps and substitutions in the aligned reads within the same window must be  $\leq 3\%$  of the total bases mapped to this window in the matched normal data

We have further required that criterion (4) to be satisfied in the normal data of at least 95% of all cases in our discovery cohort, in order to minimize false negative detections in the matched normal sample due to insufficient sampling, especially at relatively low coverage regions.

Again, criteria 3 and 4 specify how strong the evidence for the indel is in tumor and how “clean” (i.e. absence of gaps and substitutions) the corresponding region is in the normal data. Their values were

fine tuned to achieve optimal performance for both sensitivity and specificity on the first 10 tumor and matched normal pairs sequenced. Similar to the training procedures for somatic SNVs, sensitivity was assessed using data on 8 known somatic indels in a subset of these 10 patients, and FDR was estimated using replicate sample pairs. The final parameter set selected achieved a sensitivity of 100% at  $FDR \leq 3\%$  in our training procedure, and led to the identification of 597 somatic indels among the first 10 tumor and matched normal pairs sequenced in the first phase.

### **Somatic indel validation**

We performed independent Sequenom MassARRAY genotyping assays on a subset of 189 predicted somatic indels. This subset was selected to include all coding somatic indels plus non-coding somatic indels from case “pfg008” (which is a microsatellite unstable case), that are shorter than 40bp, after removing the known ones used in the training process and those failed primer/assay design (Supplementary Table 3). Each indel was assayed in both the tumor and the matched normal samples from the original patient. 185 (97.9%) of the 189 cases were confirmed as somatic. Of the 4 that failed, two were due to false positive indel calls made in tumor samples and 2 were due to false negative detection of germ-line indels in the matched normal samples (Supplementary Table 3). We removed these 4 invalidated somatic indels from our final results. Although we have confirmed only a subset of the predicted somatic indels in the first 10 cases, the high confirmation rate we have demonstrated here indicates that vast majority of the unconfirmed somatic indels in our final results on all 22 cases are likely to be true.

### **Mutation annotation and functional impact prediction**

Predicted somatic mutations and somatic indels were annotated using the Ensembl database version 54 (May 2009, <http://may2009.archive.ensembl.org/index.html>) via the associated Perl API. A list of predicted variation consequences relative to the transcript structure can be found at <http://uswest.ensembl.org/info/docs/variation/index.html>. When multiple transcripts were found for annotating a given variant, the longest transcript(s) was used.



Potential functional impact of the somatic mutations were predicted using an in-house installation of SIFT (version 4.0.3, <http://sift.jcvi.org/>) with default parameters provided by the tool.

Known germ-line variations in our predictions were searched using dbSNP build 130 downloaded from the UCSC genome browser (<http://genome.ucsc.edu>). We only included SNPs that have a validation status, including those 'by-cluster', 'by-frequency', 'by-submitter', 'by-2hit-2allele', 'by-hapmap' and 'by-1000genomes'.

### Driver gene prediction

Somatic mutations that are passenger events are not under selection pressure thus may simply reflect background mutations in tumors. We therefore devised a “driver gene score” that tests whether the observed mutation frequency of a gene is statistically significantly higher than expected by background mutation alone, after correcting for molecular subtypes of gastric cancer and different types of somatic mutations. The score consists of 4 components, each assessing the probability that the observed number of 1) somatic SNVs in microsatellite stable (MSS) gastric tumors, 2) somatic SNVs in microsatellite unstable (MSI) gastric tumors, 3) somatic indels in MSS tumors and 4) somatic indels in MSI tumors, can be expected simply by the background mutation frequency. The 4 MSI cases were separated from the 18 MSS cases due to their drastically different background mutation rates as a result of DNA mismatch repair deficiency. Somatic SNVs and somatic indels were also considered different categories as their background mutation rates need to be separately estimated.

### Estimating the background mutation rate for somatic SNVs

For somatic SNVs, it has been shown that the background mutation rate can be different at different nucleotide bases<sup>7,8</sup>. We started by counting the total number of exon bases in each nucleotide category,  $N_i$ ,  $i \in \{A, C, G, T\}$ , that are sufficiently covered in individual tumors ( $\geq 3X$ ) and their matched normal samples ( $\geq 10X$ ). The total number of protein-altering background mutations in each nucleotide category was estimated by multiplying the number of observed synonymous somatic SNVs,  $s_i$ , by the nonsynonymous-to-synonymous SNV ratio,  $r_i$ . The latter was computed by a

simulation where we randomly substituted each position in the DNA codons and counted whether it will lead to a change in the encoded amino acid. The background mutation rate for protein-altering somatic SNVs can then be calculated as

$$f_i^s = \frac{s_i \cdot r_i}{N_i}$$

For a gene,  $g$ , with sufficiently covered coding bases in each nucleotide category,  $n_{gi}$ , the expected number of protein-altering mutations is:

$$\lambda_g^s = \sum_i f_i^s \cdot n_{gi}$$

Then given the observed number of protein-altering somatic SNVs in this gene,  $x_g^s$ , the probability that it can be expected by background mutation rate was computed using the Poisson distribution as

$$p_g^s = \sum_{k \geq x_g^s} \frac{(\lambda_g^s)^k e^{-\lambda_g^s}}{k!}$$

This process was separately applied to both MSS cases and MSI cases. For each group we aggregated the counts across all samples to obtain one set of background mutation rates and a single p-value for each gene. The background mutation rates for somatic SNVs in both MSS and MSI cases are summarized in Supplementary Table 17.

### Estimating the background mutation rate for somatic indels

Background mutation rate for somatic indels is more difficult to estimate accurately than that for somatic SNVs, as all indels in the coding regions are protein-altering thus may be under general negative selection pressure. We decided to treat all somatic indels not overlapping with any coding exon or essential splice site in the SureSelect baits as background indel mutations, since they are unlikely to have functional consequences. In addition, since these noncoding regions mainly consist of sequences flanking the coding exons, such as those from nearby introns and UTRs, recent evidence has suggested that there is no significant differences in the overall mutation rate between

such regions and coding exons<sup>9</sup>. One possible explanation is that because these regions are also transcribed they should be at least under the same negative selection pressure by transcription-coupled mismatch repair, as previously suggested<sup>3,10,11</sup>. Even if additional negative selection pressure exists for coding exons compared to these noncoding regions, it will cause our background mutation rate to be slightly over-estimated, which won't inflate the statistical significance of our findings. Of the 37.6Mb bait sequences in the Agilent SureSelect exome capture kit, 10.3Mb (or 27.5%) belong to flanking non-coding regions. Due to the fact that SureSelect capture baits are designed to be centered around coding exons<sup>12</sup>, the depth of coverage in coding regions is slightly higher than that in the flanking non-coding regions (mean coverage of 122X and 98X, respectively). However, at such high depth, the influence of coverage depth on variant detection is likely to have reached saturation<sup>13,14</sup>, which justifies a direct comparison of the somatic indel mutation rate between these regions.

We counted the total number of non-coding bases in the SureSelect bait sequences that were sufficiently covered in individual tumors ( $\geq 3X$ ) and their matched normal samples ( $\geq 10X$ ),  $N_{nc}$ , and the number of detected somatic indels,  $d_{nc}$ , in these non-coding regions. The background somatic indel mutation rate was then calculated as:

$$f^d = \frac{d_{nc}}{N_{nc}}$$

Then for any gene,  $g$ , with sufficiently covered coding bases,  $n_g$ , the expected number of background somatic indels is

$$\lambda_g^d = f^d \cdot n_g$$

Given the observed number of somatic indels overlapping with the coding regions or essential splice sites of this gene,  $x_g^d$ , we can again compute the  $p$ -value based on the Poisson distribution as:

$$p_g^d = \sum_{k \geq x_g^d} \frac{(\lambda_g^d)^k e^{-\lambda_g^d}}{k!}$$

Similar to somatic SNVs, background mutation rates for somatic indels were estimated separately for the MSS cases and the MSI cases. For each group, counts from all samples were aggregated to obtain a single background mutation rate and  $p$ -value for each gene. The background mutation rates for somatic indels in both MSS and MSI cases are summarized in Supplementary Table 17.

### Calculating driver gene score

We then combined the  $p$ -values from each of the 4 categories (i.e. somatic SNVs in MSS cases, somatic SNVs in MSI cases, somatic indels in MSS cases and somatic indels in MSI cases) using the truncated product method<sup>15</sup>, which takes the product of only those  $p$ -values less than a specified cut-off value (0.05 in our study) and evaluates the probability of such a product, or a smaller value, under the overall hypothesis that the observed somatic mutations in all 4 categories are due to the background.

The combined  $p$ -value was further adjusted for multiple hypotheses testing of all genes carrying at least one protein-altering somatic mutation in at least two patients in our dataset using the  $q$ -value method<sup>16</sup>. Lastly, the resulting  $q$ -score,  $q_g$ , was converted to the “driver gene score”,  $DS_g$ , by

$$DS_g = -\log_{10}(q_g)$$

Genes with  $DS_g \geq 0.7$  (i.e.  $q_g \leq 0.2$ ) were selected to be top drivers of gastric cancer.

This process led to the selection of 21 putative driver genes. For mutations in these genes that have not been experimentally validated, they were all manually confirmed by examining the alignments in Integrative Genomic Viewer (<http://www.broadinstitute.org/software/igv>), except for two 99bp deletions (chr14:20749306-20749405) in gene HNRNPC. These two mutations were selected because they overlap with an essential splice site. However, our manual examination revealed that the deletion simply remove the entire intron between the first and second exon of HNRNPC, which

should have no effect on the resulting protein. In addition, there is no evidence of alternative splicing between the first two exons of this gene. Based on this information, we removed HNRNPC from our final putative driver gene list.

## Pathway analysis

MSigDB<sup>17</sup> pathway databases (v3.0) were downloaded from the Broad Institute (<http://www.broadinstitute.org/gsea/msigdb/index.jsp>). We searched for over-represented molecular pathways among genes with protein-altering somatic mutations. In order to retain only the driver mutations while removing those passenger ones as much as possible, we used SIFT functional impact predictions (<http://sift.jcvi.org/>) as a crude filter and removed all nonsynonymous somatic SNVs not predicted as “damaging”. Genes with somatic mutations in at least one patient in the discovery cohort, including SNVs predicted to be “damaging” by SIFT, those leading to stop-codon gains and losses or at essential splice site, and somatic indels overlapping coding regions, were searched for enrichment among gene sets in GO biological processes, KEGG pathways and Biocarta pathways. Gene sets with less than 10 members or more than 500 members were excluded. Enrichment was tested using Fisher’s exact test. False discovery rate (FDR) was computed based on permutation, where 1000 random gene sets of same size as the input mutated gene list were queried for enrichment in the pathway database, keeping intact the intrinsic correlation structure among the pathway gene sets. Then for each gene set in the database with enrichment p-value of  $p$  with respect to the mutated gene list, the number of other gene sets with enrichment p-value  $\leq p$  was counted and denoted  $N_p$ . The same number was also counted with respect to each of the 1000 random input gene lists, and the average,  $N_o$ , was taken as an empirical estimate of number of false discoveries at the p-value cutoff  $p$ . FDR was then computed as  $N_o/N_p$ .

## Reference

1. Li, H. *et al.* The Sequence Alignment/Map format and SAMtools. *Bioinformatics* **25**, 2078-9 (2009).
2. Li, H., Ruan, J. & Durbin, R. Mapping short DNA sequencing reads and calling variants using mapping quality scores. *Genome Res* **18**, 1851-8 (2008).

3. Pleasance, E.D. *et al.* A comprehensive catalogue of somatic mutations from a human cancer genome. *Nature* **463**, 191-6 (2010).
4. Greenman, C. *et al.* Patterns of somatic mutation in human cancer genomes. *Nature* **446**, 153-8 (2007).
5. Krawitz, P. *et al.* Microindel detection in short-read sequence data. *Bioinformatics* **26**, 722-9.
6. Chen, K. *et al.* PolyScan: an automatic indel and SNP detection approach to the analysis of human resequencing data. *Genome Res* **17**, 659-66 (2007).
7. Sjoblom, T. *et al.* The consensus coding sequences of human breast and colorectal cancers. *Science* **314**, 268-74 (2006).
8. Kan, Z. *et al.* Diverse somatic mutation patterns and pathway alterations in human cancers. *Nature* **466**, 869-73 (2010).
9. Totoki, Y. *et al.* High-resolution characterization of a hepatocellular carcinoma genome. *Nat Genet.*
10. Pleasance, E.D. *et al.* A small-cell lung cancer genome with complex signatures of tobacco exposure. *Nature* **463**, 184-90 (2010).
11. Lee, W. *et al.* The mutation spectrum revealed by paired genome sequences from a lung cancer patient. *Nature* **465**, 473-7 (2010).
12. Gnirke, A. *et al.* Solution hybrid selection with ultra-long oligonucleotides for massively parallel targeted sequencing. *Nat Biotechnol* **27**, 182-9 (2009).
13. Bentley, D.R. *et al.* Accurate whole human genome sequencing using reversible terminator chemistry. *Nature* **456**, 53-9 (2008).
14. Shah, S.P. *et al.* Mutational evolution in a lobular breast tumour profiled at single nucleotide resolution. *Nature* **461**, 809-13 (2009).
15. Zaykin, D.V., Zhivotovsky, L.A., Westfall, P.H. & Weir, B.S. Truncated product method for combining P-values. *Genet Epidemiol* **22**, 170-85 (2002).
16. Storey, J.D. & Tibshirani, R. Statistical significance for genomewide studies. *Proc Natl Acad Sci U S A* **100**, 9440-5 (2003).
17. Subramanian, A. *et al.* Gene set enrichment analysis: a knowledge-based approach for interpreting genome-wide expression profiles. *Proc Natl Acad Sci U S A* **102**, 15545-50 (2005).
